1 **Computational simulation of the reactive oxygen species and redox**  
2 **network in the regulation of chloroplast metabolism**

3

4 Melanie Gerken<sup>1</sup>, Sergej Kakorin<sup>2</sup>, Kamel Chibani<sup>1</sup>, Karl-Josef Dietz<sup>1\*</sup>

5

6 <sup>1</sup>Department of Biochemistry and Physiology of Plants

7 Faculty of Biology

8 Bielefeld University

9 D-33615 Bielefeld, Germany

10

11 <sup>2</sup>Physikalische Chemie III

12 Faculty of Chemistry,

13 Bielefeld University

14 D-33615 Bielefeld, Germany

15

16 **E-mail addresses:**

17 Melanie Gerken: [gerken@cebitec.uni-bielefeld.de](mailto:gerken@cebitec.uni-bielefeld.de)

18 Sergej Kakorin: [sergej.kakorin@uni-bielefeld.de](mailto:sergej.kakorin@uni-bielefeld.de)

19 Kamel Chibani: [kamel.chibani@uni-bielefeld.de](mailto:kamel.chibani@uni-bielefeld.de)

20 Karl-Josef Dietz: [karl-josef.dietz@uni-bielefeld.de](mailto:karl-josef.dietz@uni-bielefeld.de)

21

22 **\*Correspondence:**

23 Prof. Dr. Karl-Josef Dietz

24 Biochemistry and Physiology of Plants

25 Faculty of Biology, University of Bielefeld

26 University Str. 25, D-33501 Bielefeld, Germany

27 [karl-josef.dietz@uni-bielefeld.de](mailto:karl-josef.dietz@uni-bielefeld.de)

28

29 **Running title:** Thiol redox regulation simulation

30

31

32 Manuscript length (without references): words

33 No. of Figures:

34 No. of Tables:

35

36

37 **Abstract**

38 Cells contain a thiol redox regulatory network to coordinate metabolic and developmental  
39 activities with exogenous and endogenous cues. This network controls the redox state and  
40 activity of many target proteins. Electrons are fed into the network from metabolism and reach  
41 the target proteins via redox transmitters such as thioredoxin (TRX) and NADPH-dependent  
42 thioredoxin reductases (NTR). Electrons are drained from the network by reactive oxygen  
43 species (ROS) through thiol peroxidases, e.g., peroxiredoxins (PRX). Mathematical modeling  
44 promises access to quantitative understanding of the network function and was implemented for  
45 the photosynthesizing chloroplast by using published kinetic parameters combined with fitting to  
46 known biochemical data. Two networks were assembled, namely the ferredoxin (FDX), FDX-  
47 dependent TRX reductase (FTR), TRX, fructose-1,6-bisphosphatase pathway with 2-cysteine  
48 PRX/ROS as oxidant, and separately the FDX, FDX-dependent NADP reductase (FNR),  
49 NADPH, NTRC-pathway for 2-CysPRX reduction. Combining both modules allowed drawing  
50 several important conclusions of network performance. The resting  $\text{H}_2\text{O}_2$  concentration was  
51 estimated to be about 30 nM in the chloroplast stroma. The electron flow to metabolism exceeds  
52 that into thiol regulation of FBPase more than 7000-fold under physiological conditions. The  
53 electron flow from NTRC to 2-CysPRX is about 5.46-times more efficient than that from TRX-  
54 f1 to 2-CysPRX. Under severe stress (30  $\mu\text{M}$   $\text{H}_2\text{O}_2$ ) the ratio of electron flow to the thiol  
55 network relative to metabolism sinks to 1:251 whereas the ratio of electron flow from NTRC to  
56 2-CysPRX and TRX-f1 to 2-CysPRX rises up to 1:80. Thus, the simulation provides clues on  
57 experimentally inaccessible parameters and describes the functional state of the chloroplast thiol  
58 regulatory network.

59

60 **Keywords: Calvin-Benson cycle, fructose-1,6-bisphosphatase, peroxiredoxin, reactive**  
61 **oxygen species, redox regulation, thioredoxin**

62 **Authors summary**

63 The state of the thiol redox regulatory network is a fundamental feature of all cells and  
64 determines metabolic and developmental processes. However, only some parameters are  
65 quantifiable in experiments. This paper establishes partial mathematical models which enable  
66 simulation of electron flows through the regulatory system. This in turn allows for estimating  
67 rates and states of components of the network and to tentatively address previously unknown  
68 parameters such as the resting hydrogen peroxide levels or the expenditure of reductive power  
69 for regulation relative to metabolism. The establishment of such models for simulating the  
70 performance and dynamics of the redox regulatory network is of significance not only for  
71 photosynthesis but also, e.g., in bacterial and animal cells exposed to environmental stress or  
72 pathological disorders.

73

## 74 INTRODUCTION

75 Reduction-oxidation reactions drive life. In aerobic metabolism, electrons from reduced  
76 compounds pass on to oxygen to produce water and ATP. Photosynthesis exploits light energy  
77 and reverses this oxidation process by water splitting, liberation of O<sub>2</sub> and reduction of CO<sub>2</sub>,  
78 NO<sub>3</sub><sup>-</sup> and SO<sub>4</sub><sup>2-</sup> to carbohydrates, amines and sulfhydryl compounds. A decisive role is played by  
79 ferredoxin (FDX) which functions as hub of electron distribution accepting electrons from  
80 photosystem I and donating them in particular to FDX-dependent NADP reductase (FNR), FDX-  
81 dependent nitrite reductase (NIR), FDX-dependent sulfite reductase (SIR), FDX-dependent  
82 glutamate oxoglutarate aminotransferase (GOGAT), FDX-dependent thioredoxin reductase  
83 (FTR) and to O<sub>2</sub> in the Mehler reaction [1]. Considering the elemental composition of a typical  
84 plant body, C:N:S need to reduced and incorporated at a ratio of roughly 40:8:1. The establishing  
85 of this ratio and avoidance of wasteful processes requires fine-tuned regulation of electron flows  
86 and metabolism.

87 The adjustment of metabolic fluxes in the chloroplast to a major extent is controlled by electron  
88 flow into the thiol redox regulatory network. Polypeptides switch from an oxidized form with  
89 intra- or intermolecular disulfide bridges to a reduced thiol state. TRX and the chloroplast  
90 NADPH-dependent TRX reductase C (NTRC) act as electron transmitters in the reduction  
91 process. NTRC combines a NADPH-dependent TRX reductase domain with a TRX domain [2].  
92 The TRX complement of Arabidopsis plastids comprises 20 TRX and TRX-like proteins with  
93 representatives of the f-, m-, x-, y-, z-group of TRX, TRX-like proteins which include  
94 chloroplast drought-induced stress protein of 32 kDa (CDSP32), Liliun1-4 (ACHT1-4) and  
95 TRX-like [3]. TRX-f1 and TRX-f2 function in activation of Calvin-Benson-Cycle (CBC)  
96 enzymes and  $\gamma$ -subunit of F-ATP synthase [4]. TRX-m1, -m2, -m3 and -m4 are suggested to  
97 regulate targets which control the NADPH/NADP ratio [5] which is linked to their ability to  
98 efficiently activate the NADPH-dependent malate dehydrogenase [6]. TRX-x, NTRC and TRX-  
99 lilium1(ACHT4a) were identified as reductants of the 2-cysteine peroxiredoxin (2-CysPRX) [7-  
100 9], and TRX-y1 and -y2 as reductant of PRX-Q [10]. These exemplary studies describe  
101 specificity and redundancy for the interaction between TRX-forms and target proteins, as, e.g.,  
102 comparatively investigated by Collin et al. [7].

103 Upon transition from dark to light or upon an increase in photosynthetic active radiation (PAR)  
104 reductive activation of CBB enzymes via redox sensitive thiols stimulates consumption of

105 NADPH and ATP and coordinates energy provision in the photosynthetic electron transport  
106 (PET) chain and energy consumption in metabolic pathways. However it is less understood how  
107 once activated enzymes are down-regulated by oxidation. Oxygen and reactive oxygen species  
108 (ROS) function as final electron acceptors. ROS generated in the PET react with thiol  
109 peroxidases (TPX) with high affinity [11]. Redox transmitters regenerate oxidized TPX. In case  
110 of 2-CysPRX, NTRC most efficiently reduces the oxidized form. Other redox transmitters such  
111 as TRX-f1, Trx-m1 or Trx-like proteins like CDSP32 also reduce 2-CysPRX at lower rates [7].  
112 The main pathway of TRX reduction targets proteins via FDX and FTR and prevails in strong  
113 light. In addition NTRC provides electrons to 2-CysPRX which compensates for the oxidation of  
114 2-CysPRX by PET-produced H<sub>2</sub>O<sub>2</sub> [2]. The drainage of electrons from other TRXs to oxidized 2-  
115 CysPRX may be insignificant under these conditions. This situations changes in darkness were  
116 the rate through the PET-driven FDX/TRX-pathway mostly ceases or at lowered photosynthetic  
117 active radiation where intermediate flux conditions are established. This balance between  
118 oxidation and reduction is suggested to determine the rate of, e.g., the Calvin Benson cycle [12].  
119 While the experimental evidence supports the functionality of this regulatory model, quantitative  
120 understanding of the interacting electron fluxes within the network cannot be obtained  
121 exclusively from experiments but requires mathematical simulation of the involved major  
122 pathways. For this reason this study aimed to first simulate individual electron pathways and  
123 then to combine them for predicting crucial parameters of the network inaccessible to  
124 experimental determination. Using this approach, it was possible to estimate relative electron  
125 fluxes directed into carbon reduction and thiol dependent regulation, and to estimate the rate of  
126 H<sub>2</sub>O<sub>2</sub> production in the chloroplast.

127

128

129

130

## 131 RESULTS

132 Ferredoxin (FDX) functions as hub for electron distribution at the donor site of photosystem I.  
133 The first mathematical model aimed to simulate electron distribution from TRX-f1 to FBPase  
134 and 2-CysPRX in dependence on the H<sub>2</sub>O<sub>2</sub> concentration (Fig. 1A) and was built on the model  
135 presented by Vaseghi et al. [12]. The question asked concerned the efficiency of oxidized 2-  
136 CysPRX to compete with reduction of TRX-f1 by FDX-dependent TRX reductase (FTR). The  
137 H<sub>2</sub>O<sub>2</sub> concentration was adjusted to values between 0.3 nM and 10 μM and the steady state redox  
138 states of FTR, TRX-f1, FBPase and 2-CysPRX were modelled by kinetic simulation (Fig. 1B-E).  
139 The FTR was highly reduced under all conditions and there was only a slight increase from  
140 0.12% to 0.19% oxidation if the H<sub>2</sub>O<sub>2</sub> rose from 1 nM to 100 nM. Further elevation of H<sub>2</sub>O<sub>2</sub> had  
141 no further effect since the 2-CysPRX turned maximally oxidized at 100 nM and higher H<sub>2</sub>O<sub>2</sub>  
142 concentrations. In the same range, the oxidized form of TRX-f1 reached 50%, while the FBPase  
143 was oxidized by 65%.

144 Fig. 2 depicts the time-dependent changes in redox potential of the sub-network components  
145 FTR, TRX-f1, FBPase and 2-CysPRX. In the absence of H<sub>2</sub>O<sub>2</sub> or at 1 nM, the starting condition  
146 shifted to a slightly more reduced state. On the contrary, the FBPase redox potential was poorly  
147 affected by increasing the H<sub>2</sub>O<sub>2</sub> concentration from 1 to 10 μM and even 100 nM already  
148 strongly oxidized the TRX-f1 and FBPase proteins. Thus this simple network simulation together  
149 with the reported ex vivo redox states of the components allowed us to predict that stromal H<sub>2</sub>O<sub>2</sub>  
150 levels likely range somewhere between 1 and 100 nM.

151 The second model was constructed to simulate the FNR branch of the network (Fig. 3).  
152 Generated NADPH provided electrons to metabolism (v7) or to NTRC for reducing 2-CysPRX.  
153 H<sub>2</sub>O<sub>2</sub> was adjusted to concentrations between 0 and 100 μM. Fig. 3B-E depicts the relative redox  
154 forms computed for simulated 3 h which essentially represents the final steady state. The most  
155 sensitive component of the network was 2-CysPRX. At about 10 nM H<sub>2</sub>O<sub>2</sub>, the 2-CysPRX was  
156 half reduced and half oxidized. NTRC and NADPH responded significantly, here considered as  
157 increase in oxidation by at least 10%, when H<sub>2</sub>O<sub>2</sub> reached a concentration of 1 μM.

158 The simulation of the FNR-network presented in Fig. 4 focused on the time-dependent changes  
159 in redox potentials. The increase of the clamped H<sub>2</sub>O<sub>2</sub> concentration from 10 (magenta) to 100  
160 nM (black) switched the trend from increased reduction, equivalent to more negative redox  
161 potentials, to more oxidation which is equivalent to less negative redox potentials.

162 In the next step, the FTR and FNR networks were combined (Fig. 5A). The H<sub>2</sub>O<sub>2</sub> concentration  
163 was clamped to values between 0 and 100 μM as before and the redox states of the components  
164 derived in the approximated steady state after 3h of simulation (Abb. 5B-I). The H<sub>2</sub>O<sub>2</sub>  
165 concentration dependencies of the redox states at first glance were rather similar between the  
166 individual and the combined models; however there were some striking differences with likely  
167 physiological significance. The TRX-f1 was still more reduced at 100 nM H<sub>2</sub>O<sub>2</sub> in the combined  
168 than in the FTR model. Accordingly, the FBPase remained more reduced in the combined model  
169 still being 50% reduced at 100 nM H<sub>2</sub>O<sub>2</sub> while it was close to half oxidized at 10 nM in the FTR  
170 model (cf. Fig. 1 and 5).

171 The most striking difference was seen for 2-CysPRX which was half oxidized at 2 nM H<sub>2</sub>O<sub>2</sub> in  
172 the FTR model, but at slightly above 10 nM in the combined model. These important alterations  
173 in redox state after introducing the FNR branch witness the importance of the NTRC pathway in  
174 reducing 2-CysPRX in line with experimental results such as those published [9, 13]. The time-  
175 dependent changes in redox states of the network components (Fig. 6) confirmed the critical  
176 range of the H<sub>2</sub>O<sub>2</sub> concentration needed for stable redox states as also measurable *ex vivo*. Thus  
177 at 10 nM H<sub>2</sub>O<sub>2</sub> in the combined model, there was a trend towards higher reduction, while  
178 clamping the H<sub>2</sub>O<sub>2</sub> concentration to 100 nM reversed the trend toward higher oxidation of the  
179 network components.

180 The combined FTR/FNR-model allowed for estimating relative rates of electron drainage at  
181 competing branching points of the network and provided answers to the critical questions raised  
182 above. The first question addressed the estimation of the resting H<sub>2</sub>O<sub>2</sub> concentration in the  
183 stroma *in vivo*. Several experimental studies have shown that the oxidized fraction of 2-CysPRX  
184 exceeds that of the reduced fraction, e.g., [12] determined the ratio of oxidized to reduced forms  
185 to 65%:35%. Thus we asked our model at which clamped H<sub>2</sub>O<sub>2</sub> concentration this particular ratio  
186 is realized (Suppl. Table 3). The ratio of 65%:35% was established at 30 nM H<sub>2</sub>O<sub>2</sub>.

187 The second question concerned the ratio of electron flows from NADPH into metabolism (v11)  
188 and NTRC reduction (v9) assuming that only 2-CysPRX acts as electron sink (Fig. 7). For  
189 answering this question it was assumed that the H<sub>2</sub>O<sub>2</sub> concentration in the resting state is close to  
190 30 nM and then the simulated rate constants v9 and v11 and their ratios were computed (Suppl.  
191 Table 4). In this scenario, the electron flow into metabolism exceeded that into NTRC-dependent  
192 regeneration of 2-CysPRX by a factor of 7234. The rate of regulatory electron flow reached only

193 0.14‰ of metabolic reduction. This value increased with increasing  $H_2O_2$  in the simulation but  
194 did not exceed 5‰ even in the presence of 100  $\mu M$   $H_2O_2$ .

195 The third question dealt with the relative contribution of NTRC (v10) and TRX-f1 (v4) to  
196 reducing 2-CysPRX (Fig. 7). At low  $H_2O_2$  concentrations v10 exceeded v4 by 2 to 3-fold; at 30  
197 nM  $H_2O_2$  the ratio of v10/v4 was 5.5. Apparently, the flux contribution of NTRC increased with  
198 increasing  $H_2O_2$ .

199 The final simulation explored the thermodynamic equilibrium between the NADPH system and  
200 the 2-CysPRX mediated by NTRC. The ratio of NADPH/NADP<sup>+</sup> was varied between full  
201 reduction and full oxidation and the 2-CysPRX<sub>red</sub>/2-CysPRX<sub>ox</sub> computed assuming full  
202 equilibrium catalyzed by NTRC (Fig. 8A). At a ratio of NADPH/NADP<sup>+</sup>=1 only a small fraction  
203 of 2-CysPRX was in the oxidized form (Figs. 8A and B). Only at rather oxidized NADP system  
204 of 97.6% adjusted the 2-CysPRX system at the ratio of 35% reduced and 65% oxidized as  
205 reported in photosynthesizing leaves (Vaseghi et al. 2018). The computing result was confirmed  
206 experimentally with recombinant proteins of NTRC and 2-CysPRX equilibrated with varying  
207 NADPH/NADP<sup>+</sup>-ratios, labeled with 5 mM N-ethylmaleimide polyethylene glycol (mPEG<sub>mal</sub>) at  
208 pH 8 and separated on reducing sodium dodecylsulfate polyacrylamide gel electrophoresis (SDS-  
209 PAGE). The peroxidatic and resolving thiol of the reduced form bound two molecules of  
210 mPEG<sub>mal</sub> causing a shift of 10 kDa, while the disulfide bonded oxidized form could not be  
211 labeled and separated as a band at 24 kDa. In the presence of oxidized NADP<sup>+</sup>, only the oxidized  
212 form of 2-CysPRX was observed. The oxidized form decreased with increasing  
213 NADPH/NADP<sup>+</sup>-ratio. Importantly at a physiological NADPH/NADP<sup>+</sup>-ratio of 1, a significant  
214 amount of 2-CysPRX<sub>ox</sub> was visible, albeit much less than 65% as reported [12].

215

216

217

218

219



## 220 DISCUSSION

221 Redox and reactive oxygen species-dependent signaling is a fundamental property of cells. For  
222 its understanding it is of fundamental importance to define the network connections, quantify  
223 electron fluxes and determine the driving forces [14]. Due to the network character, redox  
224 signaling can hardly be fully addressed experimentally. Thus work with mutants devoid of single  
225 and multiple network elements have provided important clues on their potential roles and  
226 functions, but also bear the problem of cumulating and equivocal effects [15,16]. For this reason,  
227 this study realized a computational approach for simulating two separate sub-networks and a  
228 combined network of the chloroplast as a meaningful approach complementary to the empiric  
229 avenue. In the following we will discuss the main conclusions drawn from our simulations and  
230 also address the potential shortcomings.

231 The FDX-FTR-branch was used to simulate the distribution of electrons between activation of an  
232 exemplary target protein, the chloroplast FBPase, and reduction of 2-CysPRX. The FBPase is  
233 only one of several targets of TRX-f1 [15]. *Arabidopsis thaliana* lacking TRX-f1 lacks an  
234 obvious phenotype. However the double mutant *ntrc/trx-f1* is compromised in multiple  
235 parameters such as growth, photosynthetic carbon assimilation and activation of FBPase. In  
236 parallel the increased NADPH/NADP-ratio in the double mutant indicates an inhibition of CBC  
237 activity [15]. But even the double mutant *trx-f1/trx-f2* showed a significant reduction of the  
238 FBPase and RubisCO activase protein, indicating alternative pathways for the reduction of  
239 photosynthesis-related target enzymes. But it is noteworthy that this simplified network allowed  
240 for simulating the data from the corresponding enzyme test surprisingly well [12]. The kinetic  
241 data of the network consisting of TRX-f1, FBPase and 2-CysPRX either reconstituted from  
242 recombinant proteins in a test tube or computed in silico matched with a regression coefficient of  
243  $R^2=0.998$ . This ‘perfect’ match confirms the reliability of these particular reaction constants.

244 The model cannot reflect the complexity of the chloroplast TRX system which consists of 20  
245 TRX and TRX-like proteins (Trx-m (4) + Trx-x (1) + Trx-y (2) + Trx-f (2) + Trx-z (1) + Trx-  
246 Like2 (2) + Trx-Lilium (5) + CDS32 (1) + HCF164 (1) + NTRC (1)) and the NTRC [3,17]. The  
247 implementation of additional TRXs in the model would require quantitative data on their stromal  
248 concentration and affinity toward targets of interest. However this information is unavailable for  
249 most chloroplast TRXs. It is an interesting perspective that such interactions may be predicted

250 based in electrostatic and geometric properties of the complementary interfaces of redox  
251 transmitter and redox target in the future [18].

252 The FNR branch provides electrons from PET to NADPH which is mainly consumed in the  
253 CBC. NADPH also reduces NTRC. The reconstitution of NADPH/NTRC/2-CysPRX system  
254 showed the reversibility and equilibrium in this pathway. A highly oxidized NADP system  
255 oxidizes 2-CysPRX via NTRC. The data of Fig. 8 show that even in the presence of 75%  
256 oxidized NADP-system, only a small fraction of 2-Cys PRX turns oxidized. This result was in  
257 line with the theoretical computation of the redox equilibrium. Reverse flow from 2-CysPRX for  
258 NADP<sup>+</sup> reduction will only occur if the NADP-system is oxidized to an overwhelming fraction  
259 which rarely occurs. Such a far-going oxidation of the NADPH/NADP<sup>+</sup>-ratio was reported for  
260 spinach leaves when lowering the steady state light intensity from 250  $\mu\text{mol photons}\cdot\text{m}^{-2}\cdot\text{s}^{-1}$  to 25  
261  $\mu\text{mol photons}\cdot\text{m}^{-2}\cdot\text{s}^{-1}$  [19]. Thus the backflow may be a feedback mechanism upon sudden  
262 lowering or extinguishing the photosynthetic active radiation. After such a light step down, the  
263 CBC still consumes NADPH and strongly oxidizes the NADP-system, which oxidizes the 2-  
264 CysPRX by backflow. This mechanism will accelerate the TRX oxidation by 2-CysPRX acting  
265 as TRX oxidase [12] and thereby downregulates the CBC activity to readjust the  
266 NADPH/NADP<sup>+</sup>-ratio to reach an energetic equilibrium.

267 Simulating the effect of H<sub>2</sub>O<sub>2</sub> using the model combined from the FTR and FNR networks  
268 allowed for estimating velocities of empirically inaccessible reactions and amounts of resting  
269 H<sub>2</sub>O<sub>2</sub> concentrations. Biochemical H<sub>2</sub>O<sub>2</sub> determination in extracts or histochemical staining only  
270 provide rough estimates and possibly indications for alterations, but these quantifications give  
271 unrealistically high ROS amounts. Recent developments with H<sub>2</sub>O<sub>2</sub>-sensitive *in vivo* probes such  
272 as Hyper enable kinetic monitoring of H<sub>2</sub>O<sub>2</sub> amounts in compartments of living cells. HyPer2 is  
273 a derivative of YFP fused to the H<sub>2</sub>O<sub>2</sub> binding domain of the bacterial H<sub>2</sub>O<sub>2</sub>-sensitive  
274 transcription factor OxyR [20]. Using this sensor, Exposito-Rodriguez et al. [21] proved that  
275 chloroplast-sourced H<sub>2</sub>O<sub>2</sub> likely are transported to the nucleus. The study exclusively was based  
276 on excitation ratios but H<sub>2</sub>O<sub>2</sub> concentrations could not be estimated.

277 The steady state concentration of stromal H<sub>2</sub>O<sub>2</sub> was approximated to about 30 nM in this study.  
278 The rational was to compare the electron distribution and computed redox states of network  
279 components in the presence of different H<sub>2</sub>O<sub>2</sub> concentrations with reported data on the redox  
280 state of 2-CysPRX *ex vivo* [9,12]. The high reaction rate of 2-CysPRX with peroxide substrates

281 [22] allows for rapid oxidation of the peroxidatic thiol and conversion to the disulfide form [23].  
282 The limiting factor in the catalytic cycle is the regeneration [13,24]. The limited regeneration  
283 speed decreases the turnover number to values far below  $1 \text{ s}^{-1}$ . Consequently, any increase in  
284  $\text{H}_2\text{O}_2$  will shift the 2-CysPRX redox state to more oxidation. The value of 30 nM could be an  
285 underestimation if other TRX isoforms or other electron donors significantly contribute to the  
286 reduction of disulfide-bonded 2-CysPRX. The most interesting candidate is TRX-x which proved  
287 to be the most efficient regenerator of 2-CysPRX among the tested TRXs [7], but had little effect  
288 on the redox state of 2-CysPRX measured *ex vivo* (Pulido et al. 2010). This may not be  
289 surprising since the fraction of TRX-x only amounts to 8% of that of TRX-f1 and 5% of that of  
290 NTRC in the stroma according to the AT\_CHLORO mass-spectrometric protein database  
291 [25,26].

292 Electrons from light-driven PET are distributed among different metabolic consumers such as  
293 carbon, nitrogen and sulfur assimilation which are serviced at a ratio of about 40:8:1. In addition  
294 part of the electrons are used for regulatory purposes, namely for producing both the reductants  
295 NADPH, glutathione and TRX as redox input elements into the thiol redox regulatory network  
296 [27] and the oxidant  $\text{H}_2\text{O}_2$  [28]. The relative expenditure of reductive energy for redox regulation  
297 of the CBC cycle has been an open but unsolved issue for long, essentially since the discovery of  
298 TRXs. The mathematical simulation focusing on FBPase assumed that both the reductive and the  
299 oxidative driving forces are generated from PET. In this case and at a resting  $\text{H}_2\text{O}_2$  concentration  
300 of 30 nM, metabolic electron drainage exceeds the NTRC-dependent regeneration of 2-CysPRX  
301 by a factor of 7234-fold (Suppl. Table 4). Including the 5.46-fold lower electron flux at 30 nM  
302  $\text{H}_2\text{O}_2$  from TRX-f1 for 2-CysPRX regeneration (Suppl. Table 4) the metabolic flux exceeds the  
303 reduction rate of 2-CysPRX 6114-fold. An equivalent amount of electrons must be used to  
304 produce  $\text{H}_2\text{O}_2$ , increasing the reductive expenditure for FBPase redox regulation to  $1/3057^{\text{th}}$  of  
305 metabolic flux. Considering the other redox regulated targets such as RubiCO activase,  
306 seduheptulose-1,7-bisphosphatase, glyceraldehyde-3-phosphate dehydrogenase, ribulo-5-  
307 phosphate kinase and malate dehydrogenase and assuming that regulation of these targets  
308 consumes, e.g., 30-fold more electrons than regulation of FBPase, then about 1% of the PET rate  
309 would be drained for redox regulation.

310 Another unknown parameter in the system is the nature of oxidation in addition of PET-derived  
311  $\text{H}_2\text{O}_2$ . Two sources for oxidation should be taken into account.  $\text{H}_2\text{O}_2$  is produced outside of the

312 chloroplast, in particular in the peroxisomes, in mitochondria and at the plasmamembrane by  
313 NADPH oxidases [29]. Antioxidant systems decompose these ROS and thus it is unlikely that  
314 external  $H_2O_2$  penetrates the chloroplast and contributes to oxidation of redox target proteins.  
315 Another possible oxidant is elemental oxygen as suggested early after the discovery of  
316 thioredoxins. It would be important to obtain the kinetic data of  $O_2$ -mediated oxidation of TRX  
317 and other protein thiols in future work in order to incorporate such data in the mathematical  
318 model. Alternative oxidation reactions will increase the expenditure of electron for regulation.  
319 A unique model simulating the reactive oxygen species network of the chloroplast was  
320 constructed by Polle in 2001 [30]. It focused on the water-water cycle but did not include PRX  
321 and redox regulation. The simulation showed that neither  $O_2^-$  nor  $H_2O_2$  accumulate in the  
322 chloroplast as long as the supply with reductants is maintained high. The  $H_2O_2$  concentration was  
323 estimated in the submicromolar range. The focus here was placed in redox regulation of a CBC  
324 target protein. Additionally, the redox state of the 2-CysPRX provided a benchmark for  
325 estimating the resting  $H_2O_2$  concentration. Thus the  $H_2O_2$  production and detoxification rates  
326 establishing this low  $H_2O_2$  concentration are not of primary importance for our model.  
327

## 329 MATERIALS AND METHODS

### 330 Equilibrium between NADP-system and 2-CysPRX catalyzed by NTRC

331 Hisx6-tagged recombinant NTRC and 2-CysPRX were produced in *E. coli* and purified by Ni-  
332 nitrilotriacetic acid-based affinity chromatography as described [12]. 10  $\mu$ M recombinant NTRC  
333 was incubated with 5  $\mu$ M of 2-CysPRXA and 100  $\mu$ M NADPH/NADP<sup>+</sup> in 50 mM Tris-HCl pH  
334 8 in a final volume of 50  $\mu$ l for 5 min. Then 50  $\mu$ l of TCA 20% (w/v) was added to the mixture  
335 and maintained on ice for 40 min. The assay mix was spun for 15 min at 13,000 rpm. The pellet  
336 was washed with TCA (2%, 100  $\mu$ l). After 15 min centrifugation at 13 000 rpm, the pellet was  
337 resuspended with 15  $\mu$ l of 50 mM Tris-HCl pH 7.9 containing mPEGmal with 1% SDS. After 90  
338 min at room temperature, SDS-PAGE loading buffer with  $\beta$ -mercaptoethanol was added. 20  $\mu$ l  
339 of the mixture were separated by SDS-PAGE (12% w/v) and protein bands visualized with  
340 Coomassie-silver staining.

341

### 342 Concentration of network components.

343 Concentration of chloroplast proteins were taken from literature and calculated for 1 mg Chl  
344 referred to 66  $\mu$ l stroma [31] and 10 mg stromal protein. The calculated concentration values were  
345 summed for isoforms. In all models each H<sub>2</sub>O<sub>2</sub> and FDX concentration were set constant. The  
346 start values of variables were partitioned into 80 % of reduced and 20 % of oxidized form except  
347 for NTRC, 2-CysPRX and NADPH/NADP<sup>+</sup> couple (Suppl. Table 5).

348

### 349 Model formulation

350 Three chloroplast network models were developed to analyze electron transfer rates as well as  
351 oxidized and reduced states of network components with various H<sub>2</sub>O<sub>2</sub> concentrations. The first  
352 model describes the FTR-based electron transfer to 2-CysPRX (Fig. 1A), the second model  
353 reveals the FNR-based electron transfer (Fig. 3A) and the third model combines both models  
354 (Fig. 5A).

355

### 356 A) FTR network model

357 In order to analyse the electron distribution from TRX-f1 to FBPase or 2-CysPRX in dependence  
358 on H<sub>2</sub>O<sub>2</sub> concentration, the first simplified model of the FTR network consisted of FDX, FTR,  
359 TRX-f1, FBPase, 2-CysPRX and H<sub>2</sub>O<sub>2</sub> (Fig.1 A). FDX and H<sub>2</sub>O<sub>2</sub> were constant parameters.

360 FDX was constantly reduced by 50 % and the H<sub>2</sub>O<sub>2</sub> concentration varied from 0.3 nM to 10 μM.  
 361 The four variables were FTR, TRX-f1, FBpase and 2-CysPRX. Each variable could adopt the  
 362 oxidized and reduced state. Electrons were transferred from FDX (v1) via FTR to TRX-f1 (v2).  
 363 TRX-f1 distributed the electrons to FBpase (v3) and 2-CysPRX (v4). H<sub>2</sub>O<sub>2</sub> oxidized 2-CysPRX  
 364 (v5). The rate equations were implemented using mass action law (Appendix A1). In general the  
 365 reactions were formulated as reversible second order rates.

$$366 \quad v = k * ([Trxf1_{red}] * [2 - CysPrx_{ox}] - \frac{[Trxf1_{ox}] * [2 - CysPrx_{red}]}{K_{eq,Trxf12CP}}) \quad (1)$$

367 The transition from one electron transfer to two electron transfer takes place at FTR. Therefore,  
 368 two FDX are required to reduce FTR.

$$369 \quad v_1 = k_1 * ([FDX_{red}] * [FDX_{red}] * [FTR_{ox}] - \frac{[FDX_{ox}] * [FDX_{ox}] * [FTR_{red}]}{K_{eq,FdFTR}}) \quad (2)$$

370

## 371 **B) FNR network model**

372 The second model aimed to describing the reduction power in the FNR branch toward 2-CysPRX  
 373 and represents the electron transfer via FNR and NTRC (Fig. 3A). This FNR network model  
 374 consisted of FDX, FNR, NADPH, NTRC, 2-CysPRX and H<sub>2</sub>O<sub>2</sub>. Each component exhibited two  
 375 states in the model; oxidized and reduced form. Only FNR (the transition molecule from one to  
 376 two electron transport) was represented in three forms; reduced, half reduced and oxidized.  
 377 Electrons were transferred from FDX (constant reduced 50%) to FNROx (v1) that results in half  
 378 reduced FNR form.

$$379 \quad v_1 = k_1 * ([FDX_{red}] * [FNR_{ox}] - k_{-1} * [FDX_{ox}] * [FNR_{semired}]) \quad (3)$$

380 A further reduction by FDX of FNRsemired (v2) resulted in the fully reduced form of FNR  
 381 (FNRred).

$$382 \quad v_2 = k_2 * ([FDX_{red}] * [FNR_{semired}] - k_{-2} * [FDX_{ox}] * [FNR_{red}]) \quad (4)$$

383 FNRred transferred electrons to NADP<sup>+</sup> (v3) to produce NADPH. In order to mimic metabolic  
 384 NADPH consumption an estimated rate of NADPH decrease was included (v7). In this network  
 385 NADPH transferred electrons to NTRCox (v4) that led to reduced NTRC (NTRCred). The  
 386 reduction of 2-CysPRXox took place by NTRCred (v5). Reduced 2-CysPRX reduced H<sub>2</sub>O<sub>2</sub> to 2  
 387 H<sub>2</sub>O (v6). H<sub>2</sub>O<sub>2</sub> was included as a constant and varied from 0.3 nM to 100 μM. (Appendix B)

388

### 389 **C) The combined FTR-FNR network model**

390 To analyse the interaction between the FTR and FNR branch in adjusting the 2-CysPRX and  
391 FBPase redox states in dependence on different H<sub>2</sub>O<sub>2</sub> concentrations a third model was  
392 constructed consisting of the FTR and FNR networks (Fig. 5 A). All components except FDX  
393 and H<sub>2</sub>O<sub>2</sub> were variables and represented in reduced and oxidized form. Only FNR adopted three  
394 different redox states; reduced, oxidized and half reduced.

395 The equilibrium constants  $K_{eq}$  in all reactions were calculated using the standard cell potentials  
396  $E^o$  of each cell reaction at pH 7 linked to the standard reaction Gibbs energy  $\Delta_R G^o$  [32]:

$$397 K_{eq} = \exp(-\Delta_R G^o/RT) \quad \text{with} \quad \Delta_R G^o = -nF \cdot E^o \quad (5)$$

398 where  $R$  is the gas constant,  $T$  the thermodynamic temperature,  $F$  the Faraday constant and  $n$  the  
399 stoichiometric coefficient of the electrons in the half-reactions in which the cell reaction can be  
400 divided. The models were formalized as systems of differential equations (Appendix C). Steady-  
401 state solutions were computed numerically in MATLAB.

402

### 403 **Fitting of unknown parameter**

404 Unknown parameters were fitted to data [33]. A model was developed containing all assay  
405 components. The fitting procedure employed genetic algorithms and root mean squares for  
406 comparison of fitting quality in MATLAB. The network consisted of NADPH (0.5 mM), FNR  
407 (0.2 μM), FDX (1 μM), FTR (1μM), TRX-f1 (2 μM) (Suppl. Fig. 4).

408



409

## 410 **Appendix**

### 411 **A Model equation**

412 To represent the thiol-disulfide redox network of the cell three different models were  
 413 constructed. The FTR model (Fig. 1A), the FNR model (Fig. 2A) and after their merging the  
 414 FTR-FNR model (Fig. 3A).

#### 415 **A1 FTR network model**

416 In the model represented in Fig. 1A. FDX and H<sub>2</sub>O<sub>2</sub> are external quantities and their  
 417 concentration is constant. The variables FTR, TRX-f1, FBPase and 2-CysPRX exhibit a reduced  
 418 and oxidized form (reaction equation Suppl Table 6). The rate expressions are read

$$419 \quad v_1 = k_1 * ([FDX_{red}] * [FDX_{red}] * [FTR_{ox}] - \frac{[FDX_{ox}] * [FDX_{ox}] * [FTR_{red}]}{K_{eq\_FdFTR}}) \quad (A.1)$$

$$420 \quad v_2 = k_2 * ([FTR_{red}] * [Trxf1_{ox}] - \frac{[FTR_{ox}] * [Trxf1_{red}]}{K_{eq\_FTRTrxf1}}) \quad (A.2)$$

$$421 \quad v_3 = k_3 * ([Trxf1_{red}] * [FBPase_{ox}] - \frac{[Trxf1_{ox}] * [FBPase_{red}]}{K_{eq\_Trxf1FBPase}}) \quad (A.3)$$

$$422 \quad v_4 = k_4 * ([Trxf1_{red}] * [2 - CysPrx_{ox}] - \frac{[Trxf1_{ox}] * [2 - CysPrx_{red}]}{K_{eq\_Trxf12CP}}) \quad (A.4)$$

$$423 \quad v_5 = k_5 * [2 - CysPrx_{red}] * [H_2O_2] \quad (A.5)$$

424

425 FDX is implemented with a constant redox state of 50 % reduced and oxidized. Constant H<sub>2</sub>O<sub>2</sub>  
 426 concentration vary form 0 to 10 μM in different simulation.

427 The differential equations of the variables used for simulating FTR network model are:

$$428 \quad \frac{d[FTR_{ox}]}{dt} = -v_1 + v_2 \quad (A.6)$$

$$429 \quad \frac{d[FTR_{red}]}{dt} = +v_1 - v_2 \quad (A.7)$$

$$430 \quad \frac{d[Trxf1_{ox}]}{dt} = -v_2 + v_3 + v_4 \quad (A.8)$$

$$431 \quad \frac{d[Trxf1_{red}]}{dt} = +v_2 - v_3 - v_4 \quad (A.9)$$

$$432 \quad \frac{d[FBPase_{ox}]}{dt} = -v_3 \quad (A.10)$$

$$433 \quad \frac{d[FBPase_{red}]}{dt} = +v_3 \quad (A.11)$$

$$434 \quad \frac{d[2 - CysPrx_{ox}]}{dt} = -v_4 + v_5 \quad (A.12)$$



$$435 \quad \frac{d[2-CysPrx_{red}]}{dt} = + v_4 - v_5 \quad (A.13)$$

436

## 437 **A2 FNR network model**

438 The FNR network model (Fig 3A) consists of FDX, FNR, NADPH, NTRC, 2-CysPRX and  
 439 H<sub>2</sub>O<sub>2</sub>. Each component has an oxidized and reduced form. Only FNR exhibits three forms;  
 440 reduced, half reduced and oxidized. In order to mimic metabolic NADPH consumption an  
 441 estimated rate of NADPH decrease was included (v7). Each reaction (except v7) is reversible.  
 442 The equilibrium constants are calculated from redox potential of involved components (material  
 443 and methods). The rate expressions of FNR network model are

$$444 \quad v_1 = k_{+1} * ([FDX_{red}] * [FNR_{ox}] - k_{-1} * [FDX_{ox}] * [FNR_{semired}]) \quad (A.14)$$

$$445 \quad v_2 = k_{+2} * ([FDX_{red}] * [FNR_{semired}] - k_{-2} * [FDX_{ox}] * [FNR_{red}]) \quad (A.15)$$

$$446 \quad v_3 = k_{+3} * ([FNR_{red}] * [NADP^+] - k_{-3} * [FNR_{ox}] * [NADPH]) \quad (A.16)$$

$$447 \quad v_4 = k_4 * ([NADPH] * [NTRC_{ox}] - \frac{[NADP^+] * [NTRC_{red}]}{K_{eq\_NADPHNTRC}}) \quad (A.17)$$

$$448 \quad v_5 = k_5 * ([NTRC_{red}] * [2-CysPrx_{ox}] - \frac{[NTRC_{ox}] * [2-CysPrx_{red}]}{K_{eq\_NTRC2CP}}) \quad (A.18)$$

$$449 \quad v_6 = k_6 * [2-CysPrx_{red}] * [H_2O_2] \quad (A.19)$$

$$450 \quad v_7 = 2.05243e3 \quad (A.20)$$

451 FDX and H<sub>2</sub>O<sub>2</sub> concentrations are considered to be constants. FDX is constantly reduced at 50 %  
 452 and the H<sub>2</sub>O<sub>2</sub> concentration varies from 0 to 100 μM in different simulations.

453 The differential equation of the variables used for simulating FNR network model are:

$$454 \quad \frac{d[FNR_{ox}]}{dt} = - v_1 + v_3 \quad (A.21)$$

$$455 \quad \frac{d[FNR_{semired}]}{dt} = + v_1 - v_2 \quad (A.22)$$

$$456 \quad \frac{d[FNR_{red}]}{dt} = + v_2 - v_3 \quad (A.23)$$

$$457 \quad \frac{d[NADPH]}{dt} = + v_3 - v_4 - v_7 \quad (A.24)$$

$$458 \quad \frac{d[NADP^+]}{dt} = - v_3 + v_4 + v_7 \quad (A.25)$$

$$459 \quad \frac{d[NTRC_{ox}]}{dt} = - v_4 + v_5 \quad (A.26)$$

$$460 \quad \frac{d[NTRC_{red}]}{dt} = + v_4 - v_5 \quad (A.27)$$

$$461 \quad \frac{d[2 - CysPrx_{ox}]}{dt} = -v_6 + v_5 \quad (A.28)$$

$$462 \quad \frac{d[2 - CysPrx_{red}]}{dt} = +v_6 - v_5 \quad (A.29)$$

463

### 464 **A3 FTR-FNR network model**

465 The FTR-FNR network model (Fig. 5A) combines both submodels. FDX and H<sub>2</sub>O<sub>2</sub> are  
 466 considered to be constant quantities. The redox state of FDX is set constant to 50 % reduced  
 467 form and the concentration of H<sub>2</sub>O<sub>2</sub> varies from 0.3 nM to 100 μM. The variables are FTR,  
 468 TRX-f1, FBPAse, 2-CysPrx, FNR, NADPH/NADP<sup>+</sup> couple and NTRC. Each variable (except  
 469 FNR) is represented in an oxidized and reduced state. FNR is implemented in three forms,  
 470 oxidized, reduced and half reduced. Each reaction (except the metabolic consumption of  
 471 NADPH; v<sub>11</sub>) is reversible. The equilibrium constants are calculated from redox potentials of  
 472 involved components (see Material and Methods). The rate expressions of FTR-FNR network  
 473 model are

474

$$475 \quad v_1 = k_1 * ([FDX_{red}] * [FDX_{red}] * [FTR_{ox}] - \frac{[FDX_{ox}] * [FDX_{ox}] * [FTR_{red}]}{K_{eq\_FdFTR}}) \quad (A.30)$$

$$476 \quad v_2 = k_2 * ([FTR_{red}] * [Trxf1_{ox}] - \frac{[FTR_{ox}] * [Trxf1_{red}]}{K_{eq\_FTRTrxf1}}) \quad (A.31)$$

$$477 \quad v_3 = k_3 * ([Trxf1_{red}] * [FBPAse_{ox}] - \frac{[Trxf1_{ox}] * [FBPAse_{red}]}{K_{eq\_Trxf1FBPAse}}) \quad (A.32)$$

$$478 \quad v_4 = k_4 * ([Trxf1_{red}] * [2 - CysPrx_{ox}] - \frac{[Trxf1_{ox}] * [2 - CysPrx_{red}]}{K_{eq\_Trxf12CP}}) \quad (A.33)$$

$$479 \quad v_5 = k_5 * [2 - CysPrx_{red}] * [H_2O_2] \quad (A.34)$$

$$480 \quad v_6 = k_{+6} * ([FDX_{red}] * [FNR_{ox}] - k_{-6} * [FDX_{ox}] * [FNR_{semired}]) \quad (A.35)$$

$$481 \quad v_7 = k_{+7} * ([FDX_{red}] * [FNR_{semired}] - k_{-7} * [FDX_{ox}] * [FNR_{red}]) \quad (A.36)$$

$$482 \quad v_8 = k_{+8} * ([FNR_{red}] * [NADP^+] - k_{-8} * [FNR_{ox}] * [NADPH]) \quad (A.37)$$

$$483 \quad v_9 = k_9 * ([NADPH] * [NTRC_{ox}] - \frac{[NADP^+] * [NTRC_{red}]}{K_{eq\_NADPHNTRC}}) \quad (A.38)$$

$$484 \quad v_{10} = k_{10} * ([NTRC_{red}] * [2 - CysPrx_{ox}] - \frac{[NTRC_{ox}] * [2 - CysPrx_{red}]}{K_{eq\_NTRC2CP}}) \quad (A.39)$$

$$485 \quad v_{11} = 2.05243e3 \quad (A.40)$$

486 The complete differential equation system introduced into MATLAB is the following:

$$487 \quad \frac{d[FTR_{ox}]}{dt} = -v_1 + v_2 \quad (A.41)$$

$$488 \quad \frac{d[FTR_{red}]}{dt} = + v_1 - v_2 \quad (A.42)$$

$$489 \quad \frac{d[Trxf1_{ox}]}{dt} = - v_2 + v_3 + v_4 \quad (A.43)$$

$$490 \quad \frac{d[Trxf1_{red}]}{dt} = + v_2 - v_3 - v_4 \quad (A.44)$$

$$491 \quad \frac{d[FBPase_{ox}]}{dt} = - v_3 \quad (A.45)$$

$$492 \quad \frac{d[FBPase_{red}]}{dt} = + v_3 \quad (A.46)$$

$$493 \quad \frac{d[2-CysPrx_{ox}]}{dt} = - v_4 + v_5 - v_{10} \quad (A.47)$$

$$494 \quad \frac{d[2-CysPrx_{red}]}{dt} = + v_4 - v_5 + v_{10} \quad (A.48)$$

$$495 \quad \frac{d[FNR_{ox}]}{dt} = - v_6 + v_8 \quad (A.49)$$

$$496 \quad \frac{d[FNR_{semired}]}{dt} = + v_6 - v_7 \quad (A.50)$$

$$497 \quad \frac{d[FNR_{red}]}{dt} = + v_6 - v_8 \quad (A.51)$$

$$498 \quad \frac{d[NADPH]}{dt} = + v_8 - v_9 - v_{11} \quad (A.52)$$

$$499 \quad \frac{d[NADP^+]}{dt} = - v_8 + v_9 + v_{11} \quad (A.53)$$

$$500 \quad \frac{d[NTRC_{ox}]}{dt} = - v_9 + v_{10} \quad (A.54)$$

$$501 \quad \frac{d[NTRC_{red}]}{dt} = + v_9 - v_{10} \quad (A.55)$$

502

503

504 **Appendix B Choice of parameter**

505 The parameters of FTR-FNR network model are given in Table B.1. Most of the parameters are  
 506 available from literature. The units of concentrations are  $\mu\text{M/s}$ . The rate constants are second or  
 507 third order. Unknown rate constants are fitted (see Material and Methods). The physiological  
 508 concentrations of network components are calculated for 1  $\mu\text{g}$  Chl and 66  $\mu\text{L}$  stromal volume  
 509 (Winter *et al.*, 1994). If needed, the concentrations of isoforms are summed up.

| parameter                         | value                                                        | Reference / comment                        |
|-----------------------------------|--------------------------------------------------------------|--------------------------------------------|
| $k_{+1}$                          | $2.3078e^{+2} \mu\text{M}^{-1}\mu\text{M}^{-1}\text{s}^{-1}$ | fitted                                     |
| $k_{+2}$                          | $2.1294e^{-2} \mu\text{M}^{-1}\text{s}^{-1}$                 | fitted                                     |
| $k_{+3}$                          | $2.9616e^{-2} \mu\text{M}^{-1}\text{s}^{-1}$                 | Calculated from Collin <i>et al.</i> [35]  |
| $k_{+4}$                          | $1.84e^{-3} \mu\text{M}^{-1}\text{s}^{-1}$                   | Collin <i>et al.</i> [35]                  |
| $k_{+5}$                          | $5.1e^{-1} \mu\text{M}^{-1}\text{s}^{-1}$                    | Parsonage <i>et al.</i> [34]               |
| $k_{+6}$                          | $4.1e^2 \mu\text{M}^{-1}\text{s}^{-1}$                       | Cassan <i>et al.</i> [35]                  |
| $k_{-6}$                          | $1.5e^2 \mu\text{M}^{-1}\text{s}^{-1}$                       | Cassan <i>et al.</i> [35]                  |
| $k_{+7}$                          | $4.1e^2 \mu\text{M}^{-1}\text{s}^{-1}$                       | Cassan <i>et al.</i> [35]                  |
| $k_{-7}$                          | $2.0e^1 \mu\text{M}^{-1}\text{s}^{-1}$                       | Cassan <i>et al.</i> [35]                  |
| $k_{+8}$                          | $1.83e^1 \mu\text{M}^{-1}\text{s}^{-1}$                      | Aliverti <i>et al.</i> [36]                |
| $k_{-8}$                          | $1.04617e^2 \mu\text{M}^{-1}\text{s}^{-1}$                   | fitted                                     |
| $k_{+9}$                          | $1.489e^{-1} \mu\text{M}^{-1}\text{s}^{-1}$                  | Dai <i>et al.</i> [37]                     |
| $k_{+10}$                         | $2.1e^{-1} \mu\text{M}^{-1}\text{s}^{-1}$                    | Pérez-Ruiz <i>et al.</i> [38]              |
| $\text{Keq}_{\text{FdFTR}}$       | $9.22e^2$                                                    | calculated                                 |
| $\text{Keq}_{\text{FTRTrxfI}}$    | $1.525e^1$                                                   | calculated                                 |
| $\text{Keq}_{\text{TrxfIFBPase}}$ | $5.697 e^{-1}$                                               | calculated                                 |
| $\text{Keq}_{\text{TrxfI2CP}}$    | $3.856 e^{-1}$                                               | calculated                                 |
| $\text{Keq}_{\text{NADPHNTRC}}$   | $1.6278e^4$                                                  | calculated                                 |
| $\text{Keq}_{\text{NTRC2CP}}$     | $6.558e^{-3}$                                                | calculated                                 |
| $\text{FDX}_{\text{total}}$       | $69 \mu\text{M}$                                             | calculated from Hall <i>et al.</i> [39]    |
| $\text{FDX}_{\text{red\_fix}}$    | $34.5 \mu\text{M}$                                           | Estimated (50 % reduced)                   |
| $\text{FTR}_{\text{total}}$       | $4.7727 \mu\text{M}$                                         | calculated from Yoshida and Hisabori [33]  |
| $\text{TRX-fl}_{\text{total}}$    | $1.899 \mu\text{M}$                                          | Calculated from König <i>et al.</i> [26]   |
| $\text{FBPase}_{\text{total}}$    | $7.13267 \mu\text{M}$                                        | calculated from Peltier <i>et al.</i> [40] |

|                                      |                       |                                            |
|--------------------------------------|-----------------------|--------------------------------------------|
| 2-CysPRX <sub>total</sub>            | 63.3 $\mu\text{M}$    | Calculated from Peltier <i>et al.</i> [40] |
| FNR <sub>total</sub>                 | 4.361 $\mu\text{M}$   | Calculated from Peltier <i>et al.</i> [40] |
| NADPH <sub>total</sub>               | 100 $\mu\text{M}$     | Heber and Santarius [41]                   |
| NTRC <sub>total</sub>                | 3.165 $\mu\text{M}$   | Calculated from König <i>et al.</i> [26]   |
| H <sub>2</sub> O <sub>2</sub> _total | 0 - 100 $\mu\text{M}$ | estimated                                  |

510

511

512

### 513 **AUTHORS CONTRIBUTION**

514 MG designed the study, implemented the model, wrote the paper; SK supported the  
515 implementation of the mathematical model; KC performed the equilibration experiment between  
516 varying NADPH/NADP<sup>+</sup>-ratios, NTRC and 2-CysPRX; KJD designed the study, discussed the  
517 results and wrote the paper.

518

### 519 **ACKNOWLEDGEMENTS**

520 The financial support of the own work by Bielefeld University and the DFG (Di 346-14, -17) is  
521 gratefully acknowledged.

522

### 523 **SUPPLEMENTARY MATERIALS**

524 **Suppl. Figure 1:** Simulated steady state of FNR-network components in dependence on H<sub>2</sub>O<sub>2</sub>  
525 concentrations in the absence of electron drainage by metabolism.

526 **Suppl. Figure 2:** Simulation of time-dependent redox potential changes of FNR-network  
527 components in the absence of metabolic electron drainage.

528 **Suppl. Figure 3:** Model comparison by simulation of model components over time.

529 **Suppl. Figure 4:** Fitting of unknown parameter.

530

531 **Suppl. Table 1.** Simulated steady state concentrations of FTR-network components.

532 **Suppl. Table 2.** Simulated steady redox state of the FNR-network components.

533 **Suppl. Table 3.** Simulated steady state concentrations of the FTR/FNR-network components.

534 **Suppl. Table 4.** Calculated ratios of steady state velocities observed in the combined FTR/FNR-  
535 network.

536 **Suppl. Table 5.** Distribution of network components in reduced and oxidized form at  $t=0$  in  
537 FTR-FNR model.

538 **Suppl. Table 6.** Reaction equations describing the model of FTR network model.

539 **Suppl. Table 7.** Reaction equations describing the model of FNR network model.

540 **Suppl. Table 8.** Reaction equations describing the model of the combined FTR-FNR network  
541 model.

542 **Suppl. Table 9.** Redox potentials of network components.

543 **Suppl. Table 10.** Parameters of FTR network model.

544 **Suppl. Table 11.** Parameter of FNR network model.

545

546 **REFERENCES**

- 547 01. Hanke, G, Mulo P. Plant type ferredoxins and ferredoxin-dependent metabolism. *Plant Cell*  
548 *Environ.* 2013; 36: 1071-1084.
- 549 02. Serrato AJ, Pérez-Ruiz JM, Spínola MC, Cejudo FJ. A novel NADPH thioredoxin reductase,  
550 localized in the chloroplast, which deficiency causes hypersensitivity to abiotic stress in  
551 *Arabidopsis thaliana*. *J. Biol. Chem.* 2004; 279: 43821-43827.
- 552 03. Meyer Y, Reichheld JP, Vignols F. Thioredoxins in *Arabidopsis* and other plants.  
553 *Photosynth. Res.* 2005; 86: 419-433.
- 554 04. Gütle, DD, Roret T, Müller SJ, Couturier J, Lemaire SD, Hecker A, Dhalleine T, Buchanan  
555 BB, Reski R, Einsle O, Jacquot JP. Chloroplast FBPase and SBPase are thioredoxin-linked  
556 enzymes with similar architecture but different evolutionary histories. *Proc. Natl. Acad. Sci.*  
557 *USA.* 2016; 113: 6779-6784.
- 558 05. Hashida SN, Miyagi A, Nishiyama M, Yoshida K, Hisabor T., Kawai-Yamada M.  
559 Ferredoxin/thioredoxin system plays an important role in the chloroplastic NADP status of  
560 *Arabidopsis*. *Plant J.* 2018; 95: 947-960.
- 561 06. Scheibe R. NADP<sup>+</sup>-malate dehydrogenase in C-3-plants – Regulation and role of a light-  
562 activated enzyme. *Physiol. Plant.* 1987; 71: 393-400.
- 563 07. Collin V, Issakidis-Bourguet E, Marchand C, Hirasawa M, Lancelin JM, Knaff DB,  
564 Miginiac-Maslow M.() The *Arabidopsis* plastidial thioredoxins: new functions and new  
565 insights into specificity. *Journal of Biological Chemistry.* 2003; 278: 23747-23752.
- 566 08. Dangoor I, Peled-Zehavi H, Levitan A, Pasand O, Danon A. A small family of chloroplast  
567 atypical thioredoxins. *Plant Physiol.* 2009; 149: 1240-1250.
- 568 09. Pulido P, Spínola MC, Kirchsteiger K, Guinea M, Pascual MB, Sahrawy M, Sandalio LM,  
569 Dietz KJ, González M, Cejudo FJ. Functional analysis of the pathways for 2-Cys  
570 peroxiredoxin reduction in *Arabidopsis thaliana* chloroplasts. *Journal of Experimental*  
571 *Botany.* 2010; 61: 4043-4054.
- 572 10. Collin V, Lamkemeyer P, Miginiac-Maslow M, Hirasawa M, Knaff DB, Dietz KJ, Issakidis-  
573 Bourguet E. Characterization of plastidial thioredoxins from *Arabidopsis* belonging to the  
574 new  $\gamma$ -type. *Plant Physiology.* 2004; 136: 4088-4095.
- 575 11. Dietz KJ. Thiol-Based Peroxidases and Ascorbate Peroxidases: Why Plants Rely on Multiple  
576 Peroxidase Systems in the Photosynthesizing Chloroplast? *Mol Cells.* 2016; 39: 20-25.

- 577 12. Vaseghi MJ, Chibani K, Telman W, Liebthal MF, Gerken M, Schnitzer H, Mueller SM,  
578 Dietz KJ. The chloroplast 2-cysteine peroxiredoxin functions as thioredoxin oxidase in redox  
579 regulation of chloroplast metabolism. *Elife*. 2018; 7: e38194.
- 580 13. Muthuramalingam M, Seidel T, Laxa M, Nunes de Miranda SM, Gärtner F, Ströher E,  
581 Kandlbinder A, Dietz KJ. Multiple redox and non-redox interactions define 2-Cys  
582 peroxiredoxin as a regulatory hub in the chloroplast. *Molecular Plant*. 2009; 2: 1273-1288.
- 583 14. Jacquot JP, Dietz KJ, Rouhier N, Meux E, Lallement PA, Selles B, Hecker A. Redox  
584 regulation in plants: glutathione and “redoxin” related families. In: *Oxidative Stress and*  
585 *Redox Regulation*, Jakob U, Reichmann D. eds. Springer, Dordrecht. 2013; 213-231.
- 586 15. Thormählen I, Meitzel T, Groysman J, Öchsner AB, von Roepenack-Lahaye E, Naranjo B,  
587 Cejudo FJ, Geigenberger P. Thioredoxin f1 and NADPH-Dependent Thioredoxin Reductase  
588 C Have Overlapping Functions in Regulating Photosynthetic Metabolism and Plant Growth in  
589 Response to Varying Light Conditions. *Plant Physiology*. 2015; 169; 1766-1786.
- 590 16. Naranjo B, Diaz-Espejo A, Lindahl M, Cejudo FJ. Type-f thioredoxins have a role in the  
591 short-term activation of carbon metabolism and their loss affects growth under short-day  
592 conditions in *Arabidopsis thaliana*. *Journal of Experimental Botany*. 2016; 67: 1951-1964.
- 593 17. Chibani K, Wingsle G, Jacquot JP, Gelhaye E, Rouhier N. Comparative genomic study of the  
594 thioredoxin family in photosynthetic organisms with emphasis on *Populus trichocarpa*.  
595 *Molecular Plant*. 2009; 2 (2): 308-322.
- 596 18. Berndt C, Schwenn JD, Lillig CH. The specificity of thioredoxins and glutaredoxins is  
597 determined by electrostatic and geometric complementarity. *Chemical Science*. 2015; 6:  
598 7049-7058.
- 599 19. Prinsley RT, Dietz KJ, Leegood R. Regulation of photosynthetic carbon assimilation in  
600 spinach leaves after a decrease in irradiance. *Biochimica et Biophysica Acta*. 1986; 849: 254-  
601 263.
- 602 20. Belousov VV, Fradkov AF, Lukyanov KA, Staroverov DB, Shakhbazov KS, Terskikh AV,  
603 Lukyanov S. Genetically encoded fluorescent indicator for intracellular hydrogen peroxide.  
604 *Nature Methods*. 2006; 3: 281–286. doi: 10.1038/nmeth866.
- 605 21. Exposito-Rodriguez M, Laissue PP, Yvon-Durocher G, Smirnoff N, Mullineaux PM.  
606 Photosynthesis-dependent H<sub>2</sub>O<sub>2</sub> transfer from chloroplasts to nuclei provides a high-light  
607 signalling mechanism. *Nature Communication*. 2017; 8(1): 49.



- 608 22. Brigelius-Flohé R, Flohé L. Basic principles and emerging concepts in the redox control of  
609 transcription factors. *Antioxidants and Redox Signaling*. 2011; 15: 2335-2381.
- 610 23. König J, Baier M, Horling F, Kahmann U, Harris G, Schürmann P, Dietz KJ. The plant-  
611 specific function of 2-Cys peroxiredoxin-mediated detoxification of peroxides in the redox-  
612 hierarchy of photosynthetic electron flux. *Proceedings of the National Academy of Science*  
613 *USA*. 2002; 99: 5738-5743.
- 614 24. König J, Lotte K, Plessow R, Brockhinke A, Baier M, Dietz KJ. Reaction mechanism of the  
615 2-Cys peroxiredoxin: Role of the C-terminus and the quaternary structure. *Journal Biological*  
616 *Chemistry*. 2003; 278: 24409 - 24420.
- 617 25. Ferro M, Brugière S, Salvi D, Seigneurin-Berny D, Court M, Moyet L, Ramus C, Miras S,  
618 Mellal M, Le Gall S, Kieffer-Jaquinod S, Bruley C, Garin J, Joyard J, Masselon C, Rolland N.  
619 AT\_CHLORO, a comprehensive chloroplast proteome database with subplastidial  
620 localization and curated information on envelope proteins. *Molecular & Cellular Proteomics*.  
621 2010; 9: 1063-1084.
- 622 26. König J, Muthuramalingam M, Dietz KJ. Mechanisms and dynamics in the thiol/disulfide  
623 redox regulatory network: transmitters, sensors and targets. *Current Opinion in Plant Biology*.  
624 2012; 15: 261-268.
- 625 27. Dietz KJ. Redox signal integration: From stimulus to networks and genes. *Physiol Plantarum*.  
626 2008; 133: 459-468.
- 627 28. Driever SM, Baker NR. The water-water cycle in leaves is not a major alternative electron  
628 sink for dissipation of excess excitation energy when CO<sub>2</sub> assimilation is restricted. *Plant,*  
629 *Cell and Environment*. 2011; 34: 837-846.
- 630 29. Foyer CH, Noctor G. Redox signaling in plants. *Antioxidants & Redox Signalling*. 2013; 18:  
631 2087-2090.
- 632 30. Polle A. Dissecting the superoxide dismutase-ascorbate-glutathione-pathway in chloroplasts  
633 by metabolic modeling. Computer simulations as a step towards flux analysis. *Plant*  
634 *Physiology*. 2001; 126: 445-462.
- 635 31. Winter H, Robinson DG, Heldt HW. Subcellular volumes and metabolite concentrations in  
636 spinach leaves. *Planta*. 1994; 193: 530-535.
- 637 32. Poughon L, Dussap CD, Gros JB. Energy Model and Metabolic Flux - Analysis for  
638 Autotrophic Nitrifiers. *Biotechnology and Bioengineering*. 2001; 72: 416 – 433.

- 639 33. Yoshida K, Hisabori T. Distinct electron transfer from ferredoxin-thioredoxin reductase to  
640 multiple thioredoxin isoforms in chloroplast. *Biochemical Journal*. 2017; 474: 1347-1360.
- 641 34. Parsonage D, Youngblood DS, Sarma GN, Wood ZA, Karplus PA, Poole LB. Analysis of the  
642 Link between Enzymatic Activity and Oligomeric State of AhpC, a bacterial Peroxiredoxin,  
643 *Biochemistry*. 2005; 44: 10583-10592
- 644 35. Cassan N, Lagoutte B, Setif P. Ferredoxin-NADPH+ Reductase; Kinetics of electron  
645 transfer, transient intermediates and catalytic activities studied by flash-absorption  
646 spectroscopy with isolated photosystem I and ferredoxin, *The Journal of Biological*  
647 *chemistry*. 2005; 280: 25960- 25972.
- 648 36. Aliverti A, Pandini V, Zanetti G. Domain exchange between isoforms of ferredoxin-NADP+  
649 reductase produces a functional enzyme: *Biochim. Biophys. Acta*. 2004; 1696: 93-101.
- 650 37. Dai C, Wang MH. Isolation and characterization of thioredoxin and NADPH-dependent  
651 thioredoxin reductase from tomato (*Solanum lycopersicum*), *BMP Rep*. 2011; 44: 692-697.
- 652 38. Pérez-Ruiz JM, Spinola MC, Kirchsteiger K, Moreno J, Sahrawy M, Cejudo FJ. Rice NTRC  
653 is a high-efficiency redox system for chloroplasts protection against oxidative damage, *The*  
654 *Plant Cell*. 2006; 18: 2356-2368.
- 655 39. Hall DO, Rao KK. Ferredoxin, photosynthesis I, photosynthetic electron transport and  
656 photophosphorylation, In: *Encyclopedia of Plant Physiology*, Trebst A and Avron M, eds.  
657 1977; 5: 206-216.
- 658 40. Peltier JB, Cai Y, Sun Q, Zabrouskov V, Giacomelli L, Rudella A, Ytterberg AJ, Rutschow  
659 H, and van Wijk KJ. () The Oligomeric Stromal Proteome of *Arabidopsis thaliana*  
660 Chloroplasts. *Molecular & Cellular Proteomics*. 2006; 5.1: 114-133.
- 661 41. Heber U, Santarius KA. Compartmentation and reduction of pyridine nucleotides in relation  
662 to photosynthesis. *Biochim Biophys Acta*. 1965; 109: 390-408.
- 663
- 664

665 **FIGURE LEGENDS**

666

667 **FIGURE 1: Simulated redox state of FTR-network components in dependence on H<sub>2</sub>O<sub>2</sub>**  
668 **concentration.** (A) Schematic representation of the FTR-network. Electrons are drained from  
669 FDX through FTR and TRX-f1 to either FBPase or 2-CysPRX which in turn is oxidized by  
670 H<sub>2</sub>O<sub>2</sub>. Each component switches between the reduced and oxidized state. The concentrations  
671 were calculated for 1 mg Chl (Supplementary Table 1). FDX was clamped to 50 % reduced state.  
672 Starting values of FTR and TRX-f1 were set to 80 % reduced and 20 % oxidized. 2-CysPRX  
673 start values for reduced and oxidized form were 35% and 65% [12]. (B-E) Redox states of the  
674 network components FTR, TRX-f1, 2-CysPRX and FBPase at varying H<sub>2</sub>O<sub>2</sub> concentrations as  
675 obtained after 3h of simulation in the presence of H<sub>2</sub>O<sub>2</sub> ranging between 0 and 10 μM.

676

677 **FIGURE 2: Time-dependent simulation of redox potential changes of FTR-network**  
678 **components.** The redox potentials of FDX, FTR, TRX-f1, FBPase, 2-CysPrx were simulated at  
679 varying H<sub>2</sub>O<sub>2</sub> concentrations. Redox potentials were calculated at each time step using the Nernst  
680 equation for (A) FTR, (B) 2-CysPRX, (C) TRX-f1 and (D) FBPase. The simulation was run for  
681 15 min for each H<sub>2</sub>O<sub>2</sub> concentration adjusted to 0 nM (blue), 1 nM (red), 10 nM (magenta), 100  
682 nM (black), 1 μM (green) and 10 μM (cyan).

683

684 **FIGURE 3: Simulated steady state concentration of FNR-network components at various**  
685 **H<sub>2</sub>O<sub>2</sub> concentrations.** (A) Schematic representation of FNR-network simulated in the second  
686 model. Here, electrons passed from FDX through FNR, NADP<sup>+</sup>, NTRC to 2-CysPRX and finally  
687 H<sub>2</sub>O<sub>2</sub>. Each component was able to adopt a reduced or oxidized state. FNR is represented in three  
688 states in the model; reduced (red), semi reduced (semired) and oxidized (ox). The physiological  
689 concentrations were calculated for 1 mg Chl (Suppl. Table 2). FDX was clamped to 50 %  
690 reduction. Initial values of FNR<sub>red</sub> and FNR<sub>semired</sub> were set to 40 %. All other oxidized forms  
691 were initially set to 20 % apart from 2-CysPRX at the starting point with 65% in the oxidized  
692 form [12]. The NADPH/NADP<sup>+</sup> couple was full reduced at t=0. To mimic metabolic NADPH  
693 oxidation an additional reaction constant (v7) was added. (B-E) The redox state of the network  
694 components (B) NTRC, (C) 2-CysPRX, (D) NADPH, NADP<sup>+</sup> and (E) FNR<sub>ox</sub>, was simulated for  
695 3h at constant H<sub>2</sub>O<sub>2</sub> concentrations varying from 0 μM to 100 μM.

696

697 **FIGURE 4: Time-dependent simulation of the redox potentials of the FNR-network**  
698 **components.** The redox potentials were simulated for the FNR-network components Fd, FNR,  
699 NADPH, NTRC and 2-CysPrx in dependence of the clamped  $H_2O_2$  concentration. Redox  
700 potentials were calculated at each time step using Nernst equation for (A) NTRC, (B) 2-CysPRX  
701 and (C) NADPH/NADP<sup>+</sup> couple. The simulation was run for 10 minutes at constant  $H_2O_2$   
702 concentration of 0  $\mu$ M (blue), 1 nM (red), 10 nM (magenta), 100 nM (black), 1  $\mu$ M (green) and  
703 10  $\mu$ M (cyan).

704

705 **FIGURE 5: Simulation in the combined model of the redox states of the chloroplast**  
706 **FTR/FNR-network components in the presence of varying  $H_2O_2$  concentrations.** (A)  
707 Schematic representation of the combined FTR/FNR-network model. Electrons from FDX could  
708 flow either through the FNR branch to NADP<sup>+</sup> and NTRC or were transported through the FTR  
709 branch to TRX-f1 and FBPase. Thus electrons were transferred to 2-CysPRX and  $H_2O_2$  by  
710 NTRC and TRX-f1. Each component adopted either a reduced or oxidized state. FNR is  
711 represented in three states in the model, the reduced (red), semi reduced (semired) and oxidized  
712 (ox) form. The physiological concentrations are calculated for 1 mg chlorophyll (Suppl. Table 3).  
713 FDX was clamped to 50 % reduced state. Estimated start values of FNR<sub>red</sub> and FNR<sub>semired</sub> were  
714 each set to 40 %. The oxidized form was initially set to 20 %. Initial values of NTRC, FTR and  
715 TRX-f1 were 80 % reduced and 20 % oxidized. The initial 2-CysPRX values were set to 35%  
716 reduced and 65% oxidized form [12]. The NADPH/NADP<sup>+</sup> couple started from a fully reduced  
717 state at t=0. To mimic metabolic NADPH oxidation, the reaction constant v11 was added. (B-E)  
718 The redox states of the network components (B) FTR<sub>ox</sub>, (C) TRX-f1, (D) FBPase, (E) 2-  
719 CysPRX, (F,G) FNR, (H) NADPH, NADP<sup>+</sup> and (I) NTRC were simulated for 3h at constant  
720  $H_2O_2$  concentrations ranging from 0  $\mu$ M to 100  $\mu$ M.

721

722 **FIGURE 6: Time-dependent simulation of redox potentials of FTR/FNR-network**  
723 **components.** The redox potentials of FTR/FNR-network components were simulated and  
724 included FDX, FNR, NADPH, NTRC, FTR, TRX-f1, FBPase and 2-CysPrx. Redox potentials  
725 were calculated at each time step using the Nernst equation for (A) FTR, (B) 2-CysPrx, (C) Trx-  
726 f, (D) FBPase, (E) NTRC and (F) NADPH/NADP<sup>+</sup> couple. The simulation was run for 10 min at

727 constant  $\text{H}_2\text{O}_2$  concentrations of 0  $\mu\text{M}$  (blue), 1 nM (red), 10 nM (magenta), 100 nM (black), 1  
728  $\mu\text{M}$  (green) and 10  $\mu\text{M}$  (cyan).

729

730 **FIGURE 7: Steady state velocity ratios within the FTR/FNR network.** Steady state velocities  
731 of the FTR/FNR-network (Fig. 5 A) were obtained after simulating the electron fluxes in the  
732 presence of various  $\text{H}_2\text{O}_2$  concentrations. The physiological concentrations of network  
733 components were calculated for 1 mg chlorophyll. The  $\text{H}_2\text{O}_2$  values were clamped in the  
734 simulation as given on the x-axis. (A) The ratio of the electron flux velocities from NADPH to  
735 metabolism (v11) relative to those from NADPH to thiol network (v9) were derived after 15 min.  
736 (B) Ratio of electron transfer rates from either TRX-f1 (v4) or NTRC (v10) to 2-CysPRX as a  
737 function of clamped  $\text{H}_2\text{O}_2$  concentrations.

738

739 **FIGURE 8: Redox equilibrium between NADPH and 2-CysPRX catalyzed by NTRC as**  
740 **computed *in silico* and measured experimentally in the reconstituted system.** (A) (B) The  
741 equilibrium between varying NADPH/NADP<sup>+</sup>-ratios and 2-CysPRX was computed using a  
742 mathematical model consisting of differential equations. (B) Enzymatic assays containing 10  $\mu\text{M}$   
743 NTRC, 5  $\mu\text{M}$  2-CysPRX and 100  $\mu\text{M}$  total (NADPH / NADP<sup>+</sup>) in TRIS-buffer, pH 8, were  
744 incubated for 5 min. After labeling the free thiols with mPEG-maleimide which causes an  
745 increase in molecular mass by 5 kDa per introduced label, thus 10 kDa for two thiols, samples  
746 were separated by SDS-PAGE and visualized by Coomassie-silver staining. The positions in the  
747 gel of the oxidized (no label) and reduced forms (two labels) of 2-CysPRX are indicated.

Figure 1: Gerken et al

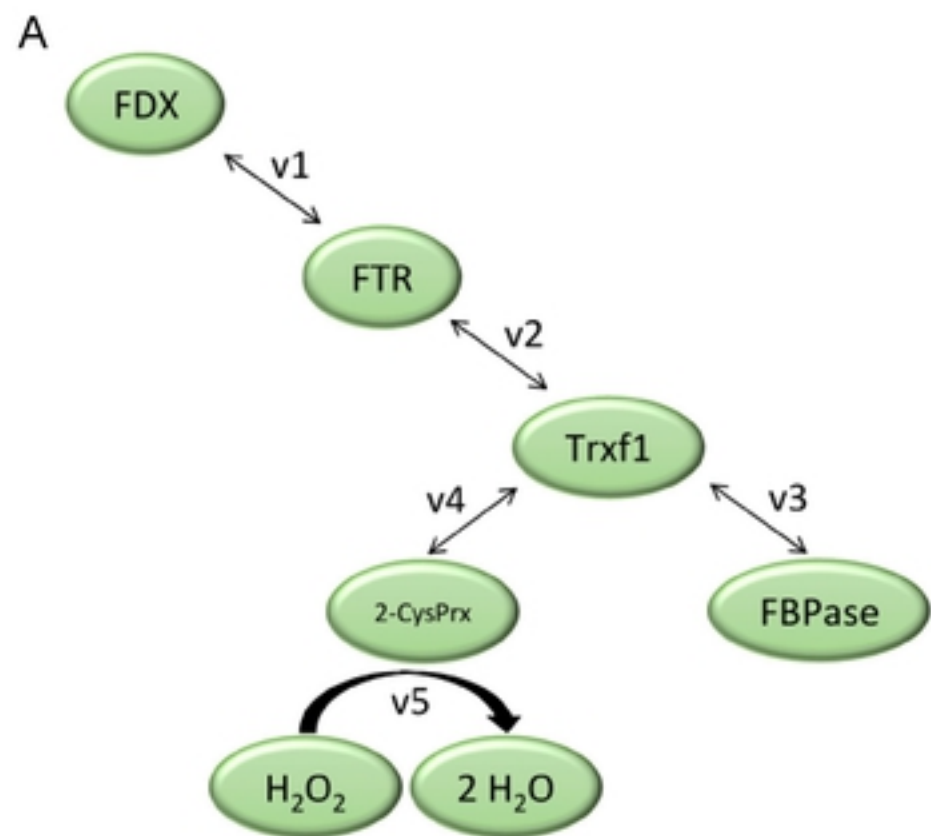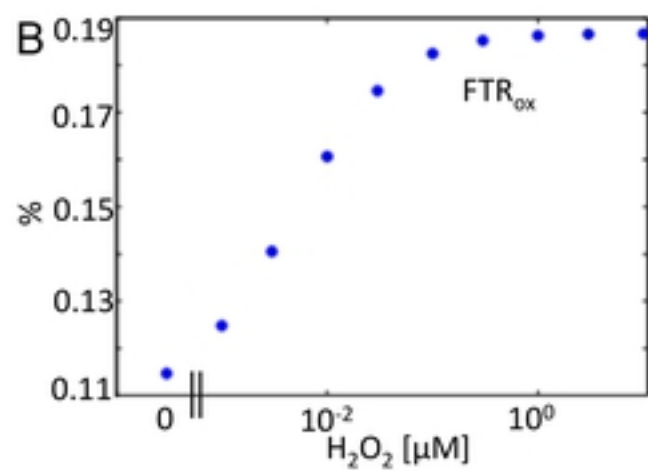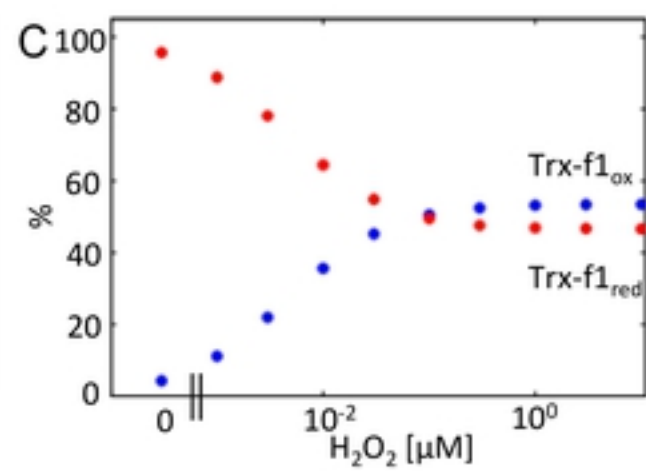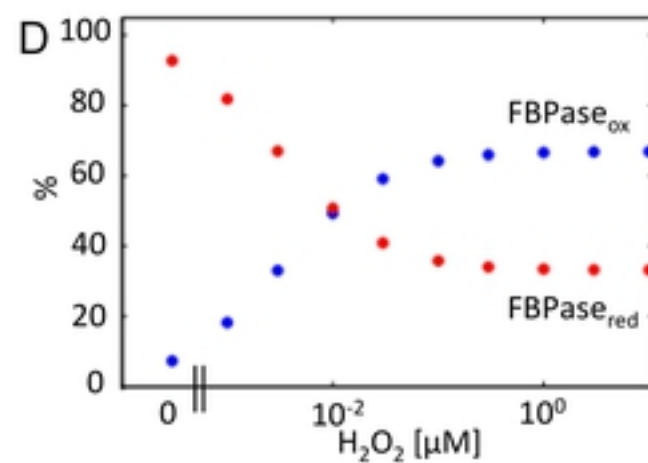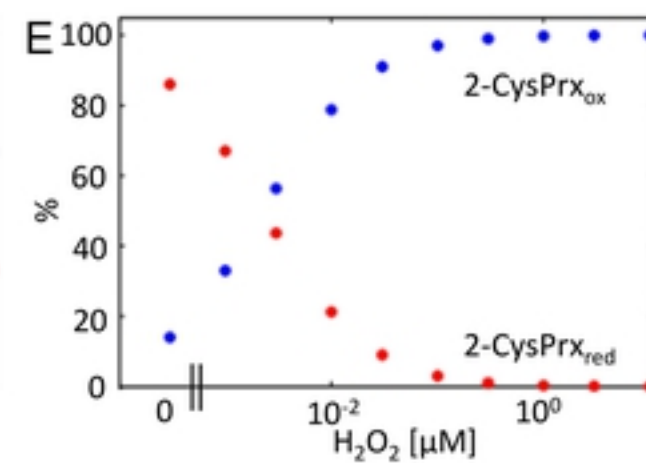

Figure 2: Gerken et al

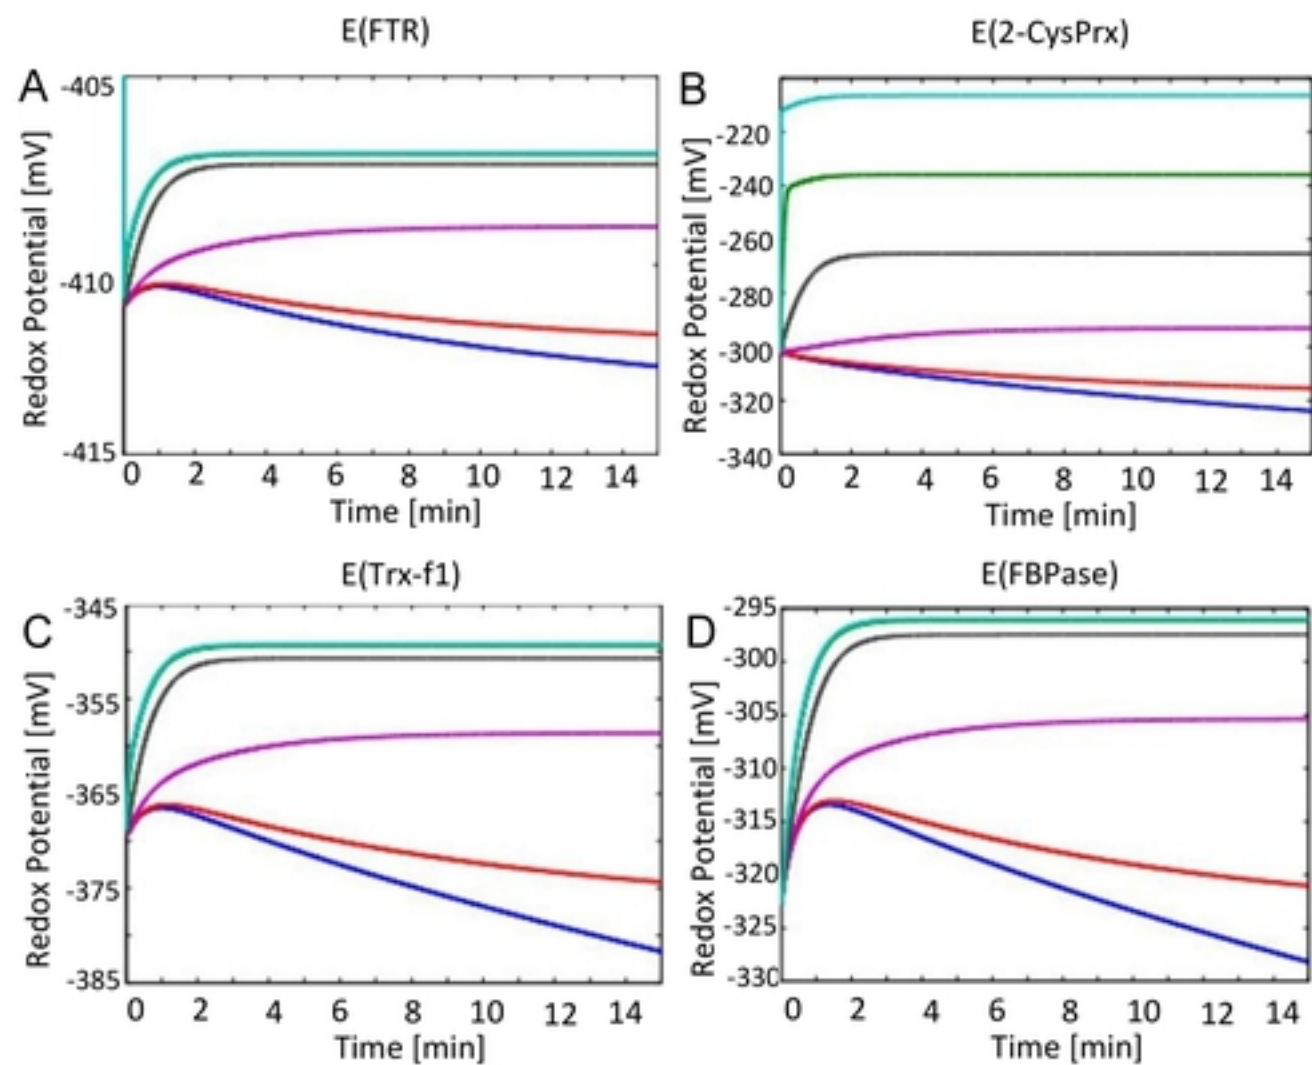



Figure 3: Gerken et al

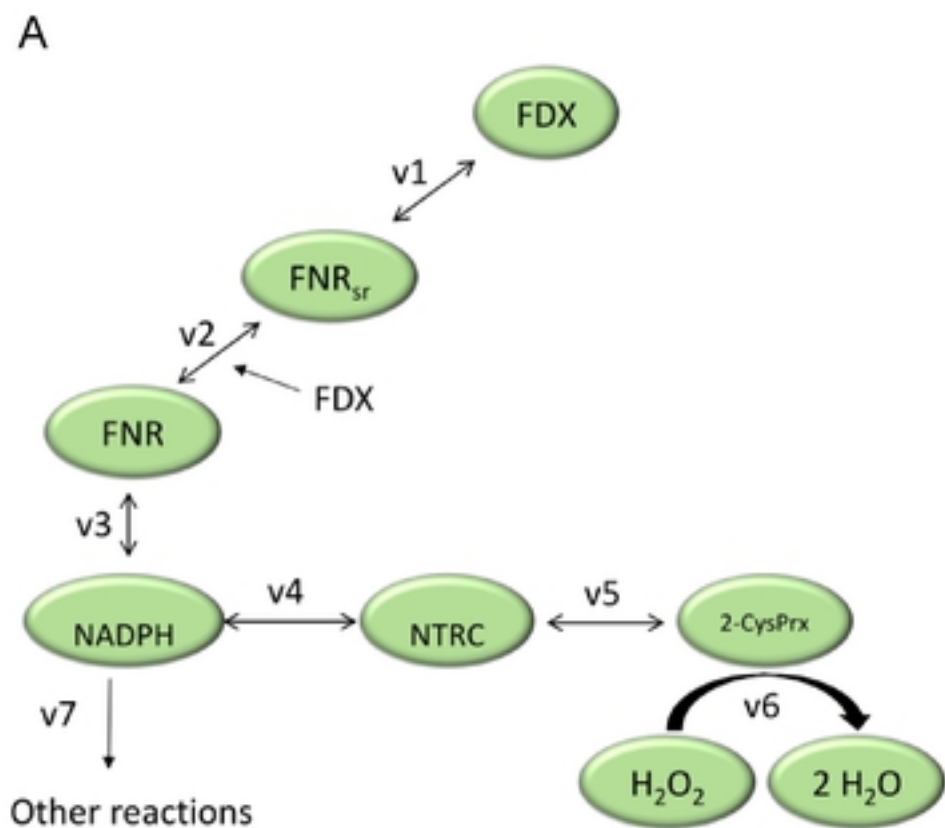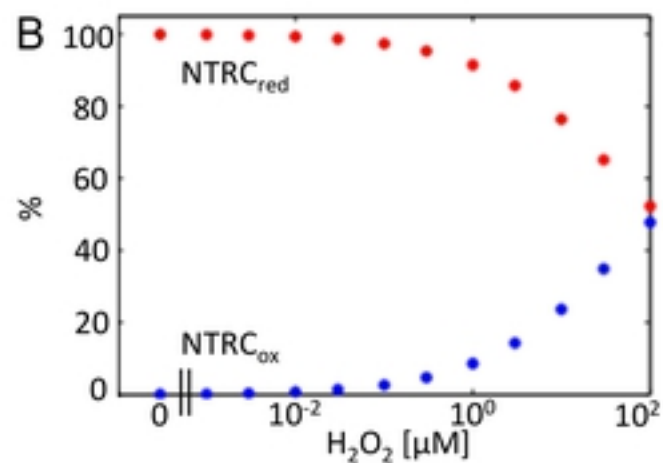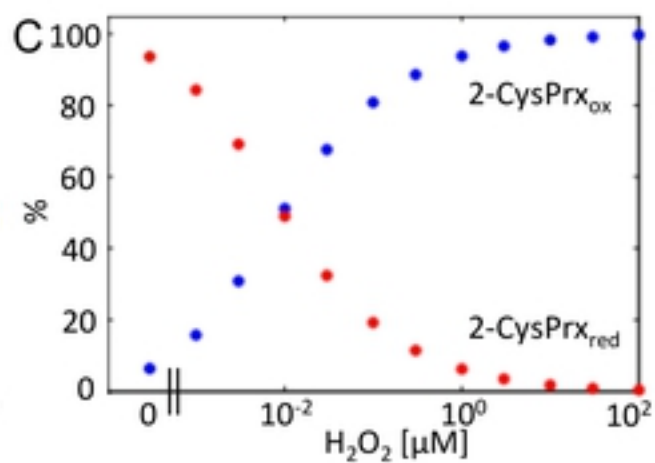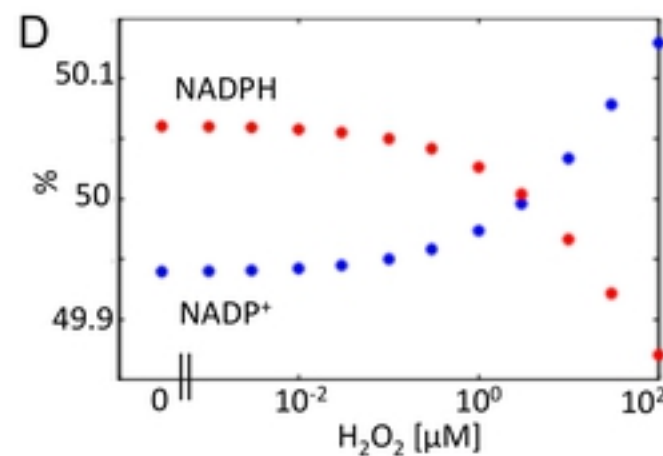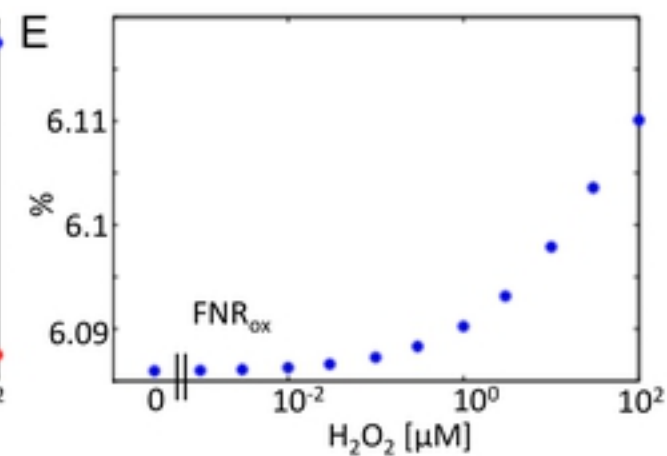



Figure 4: Gerken et al

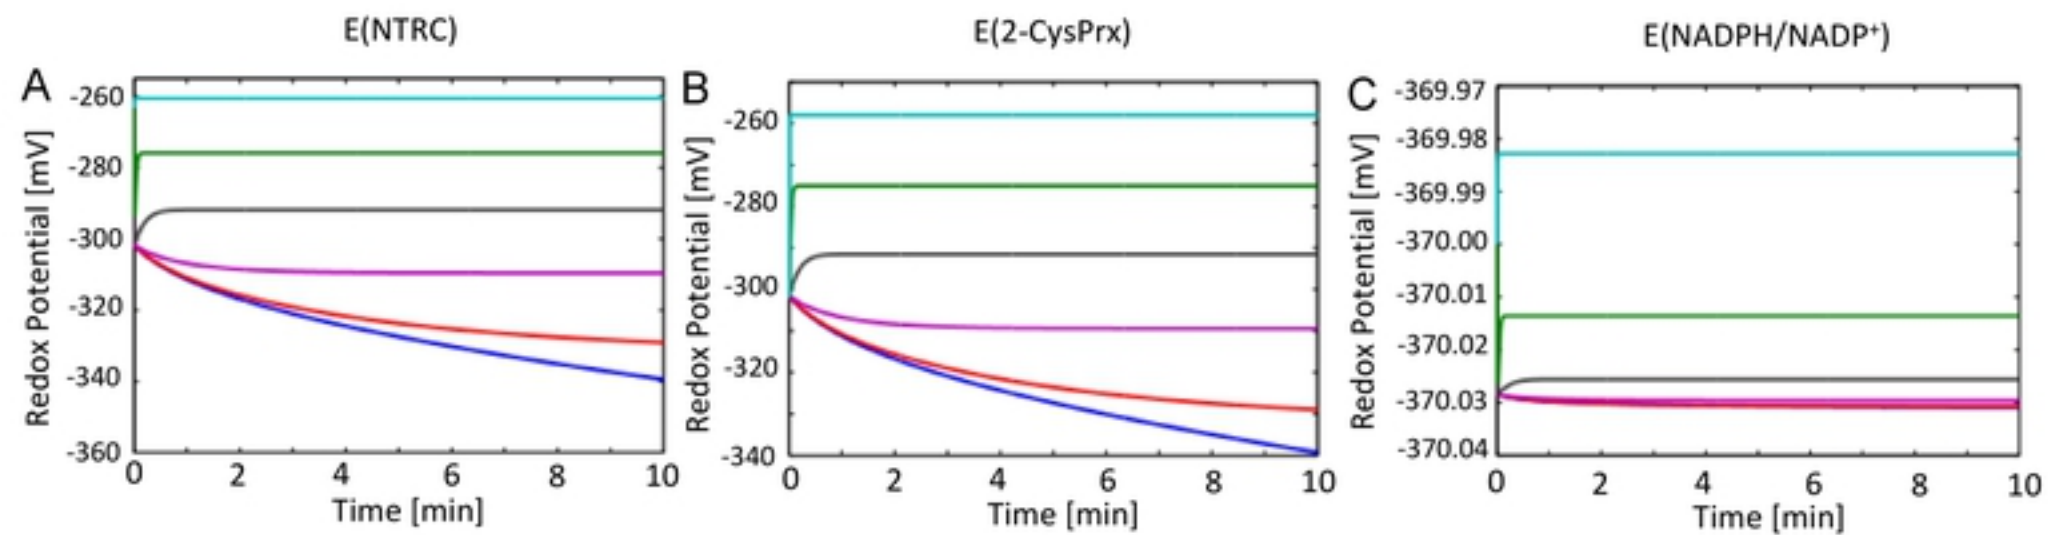

Figure 5: Gerken et al

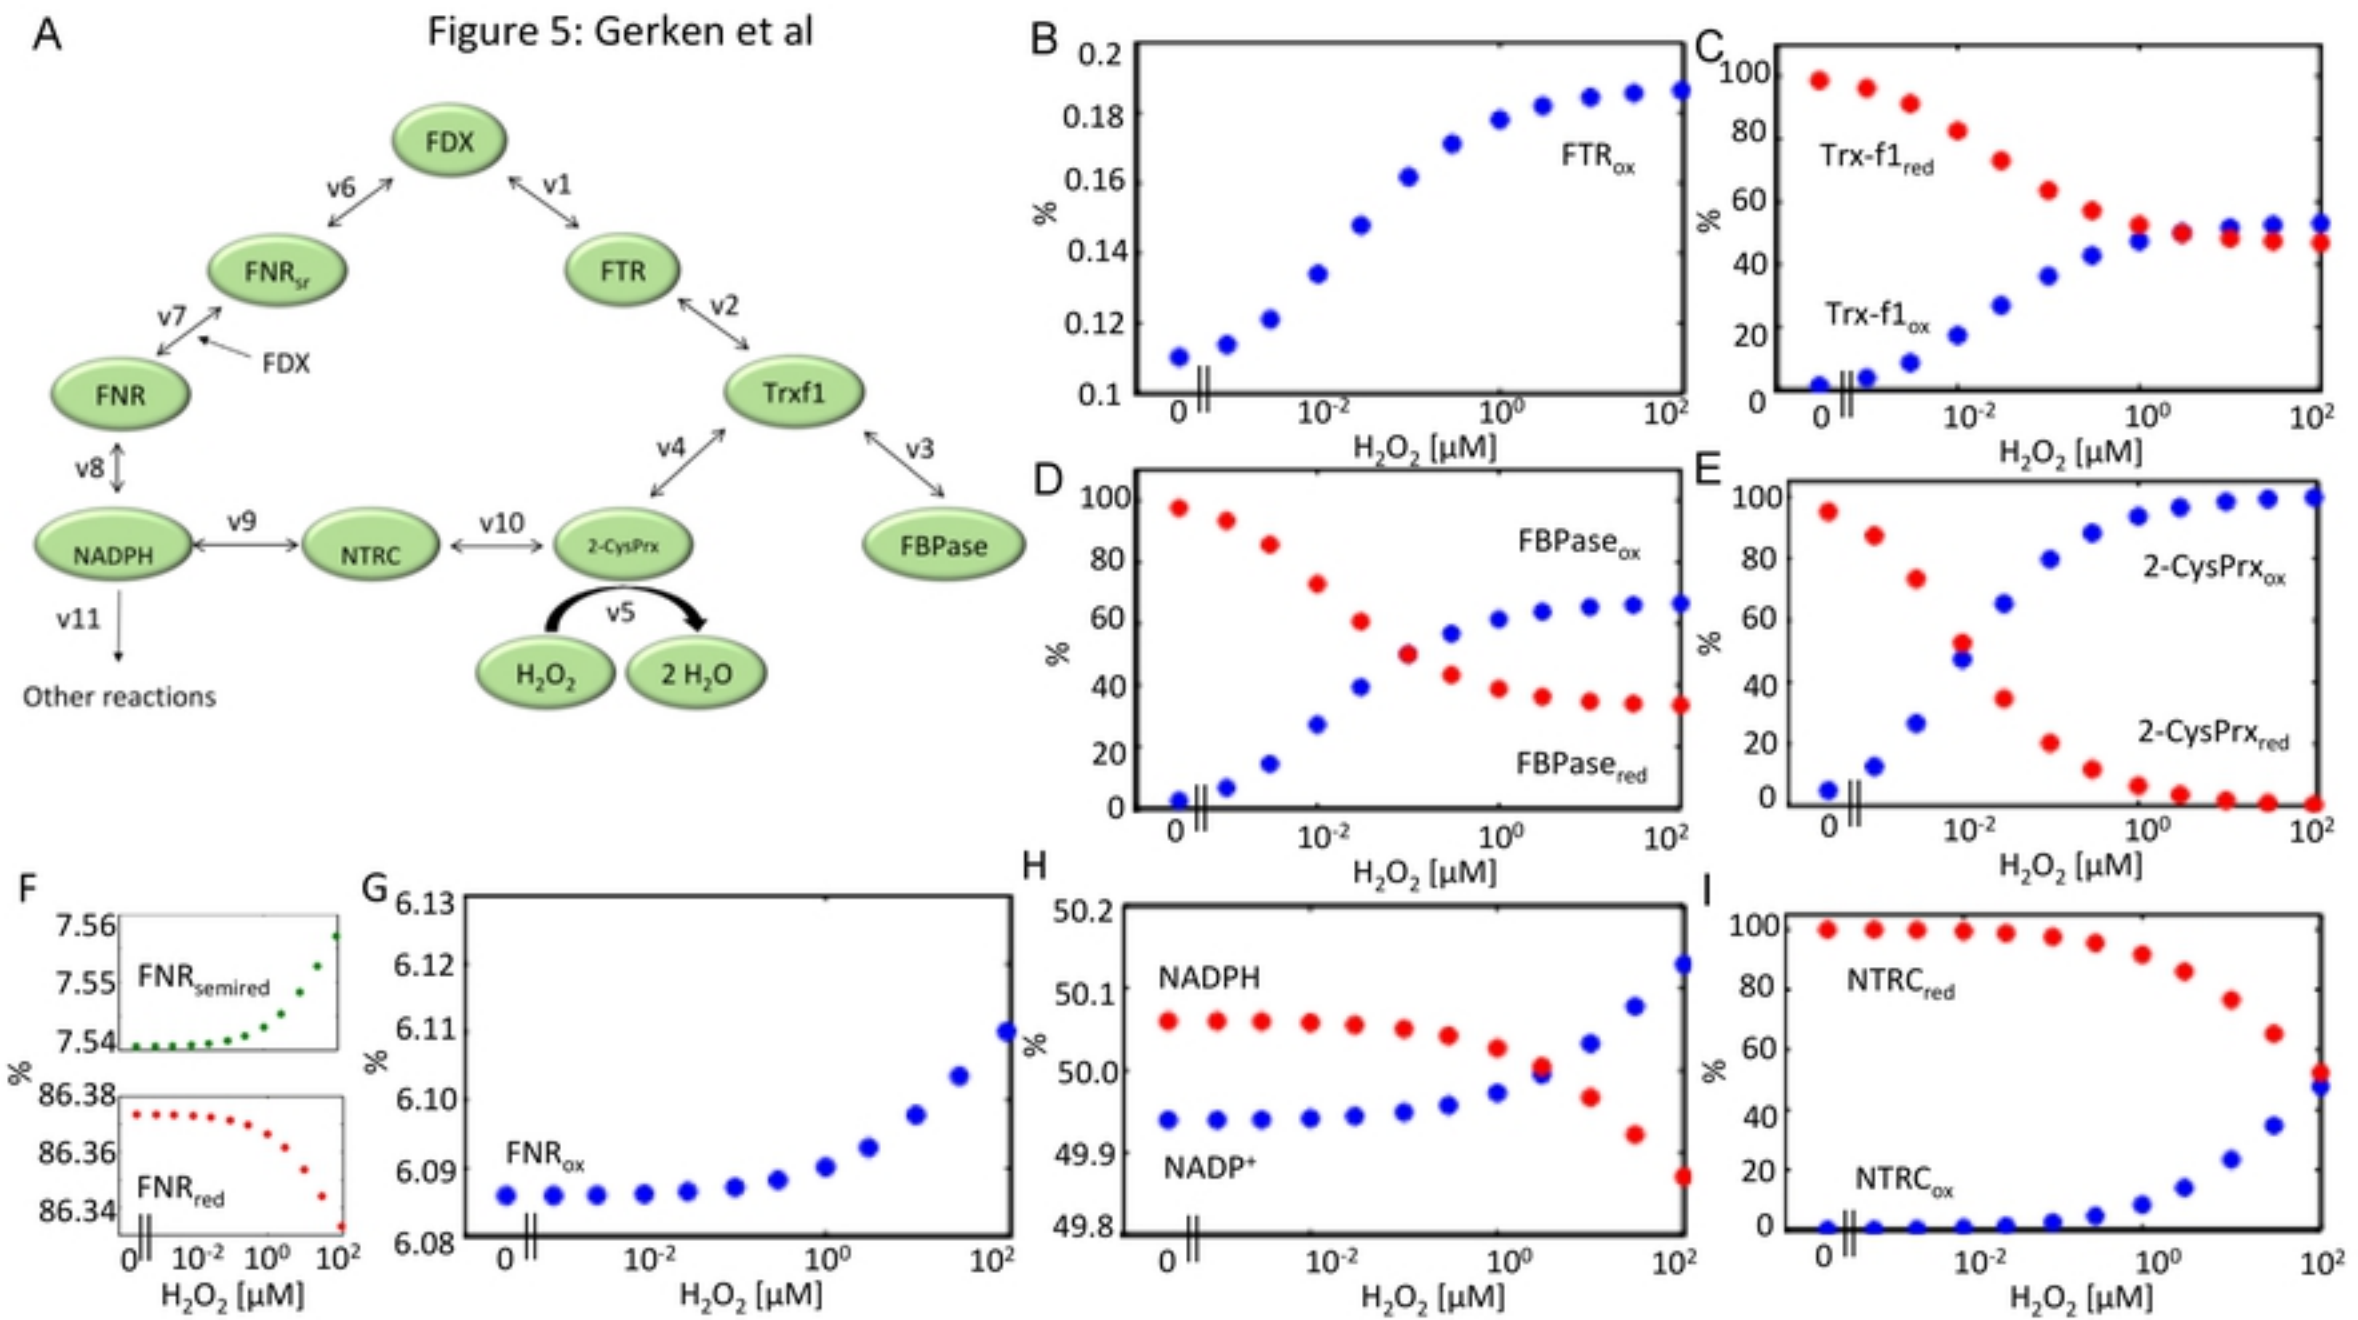

Figure 6: Gerken et al

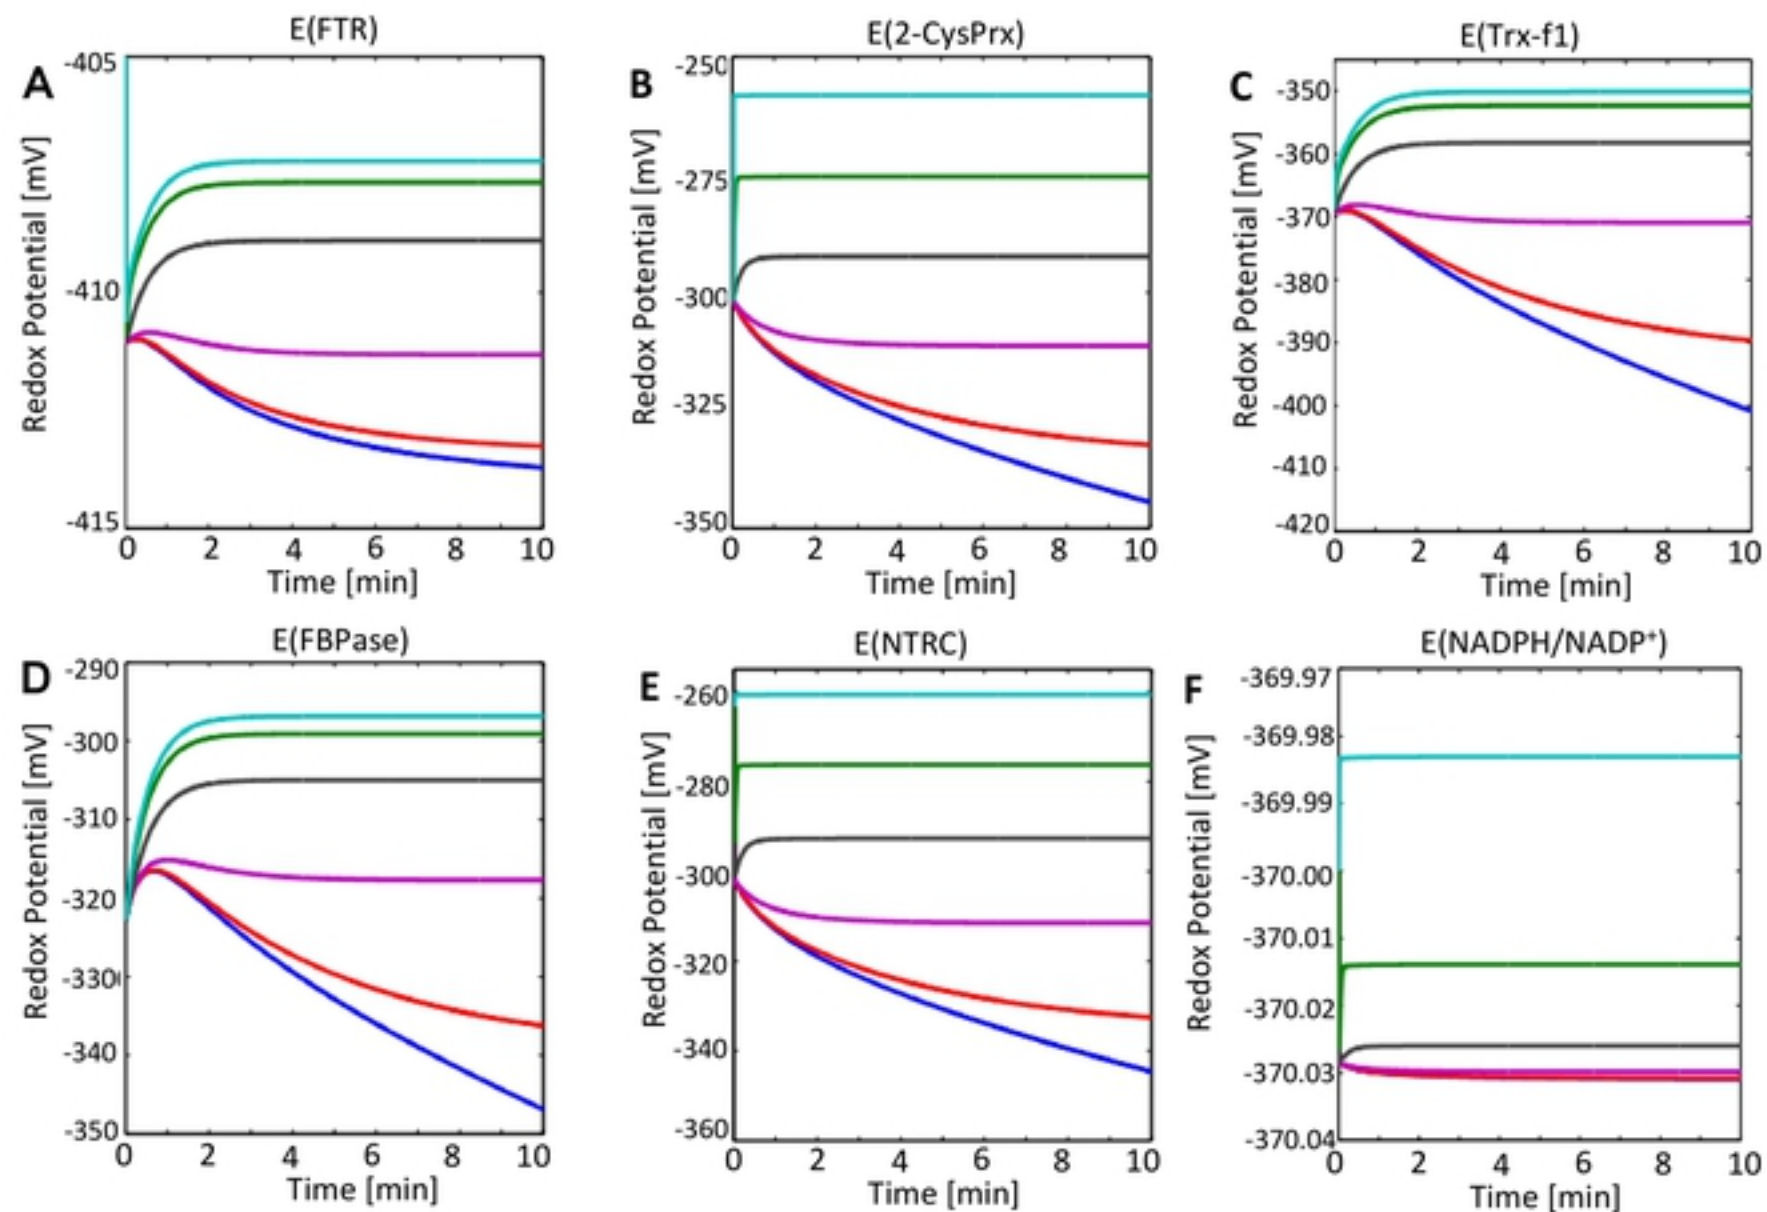

Figure 7: Gerken et al

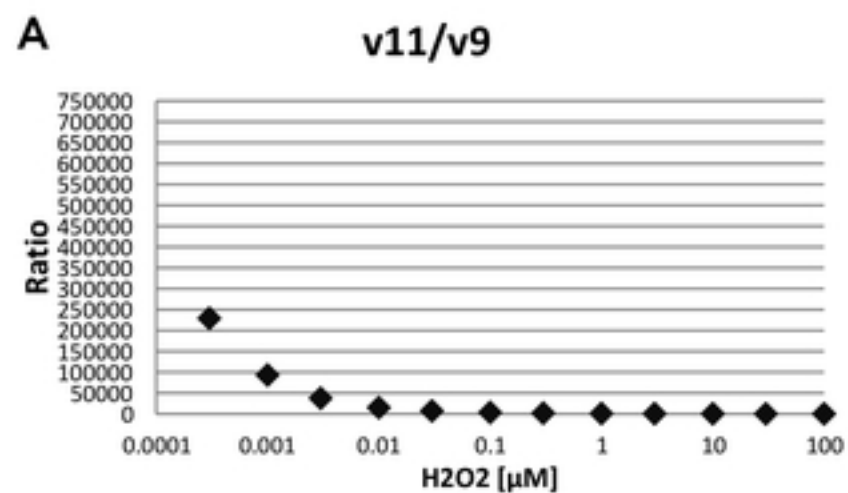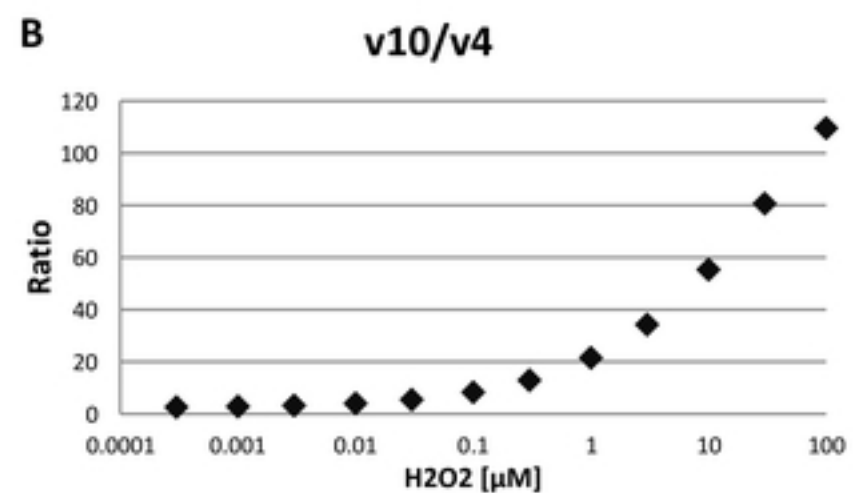

Figure 8: Gerken et al

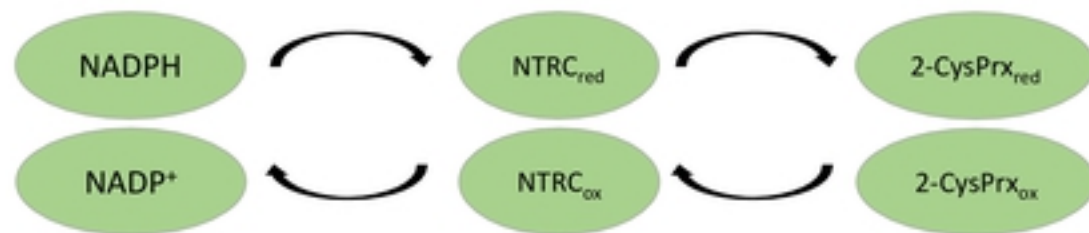

**A**

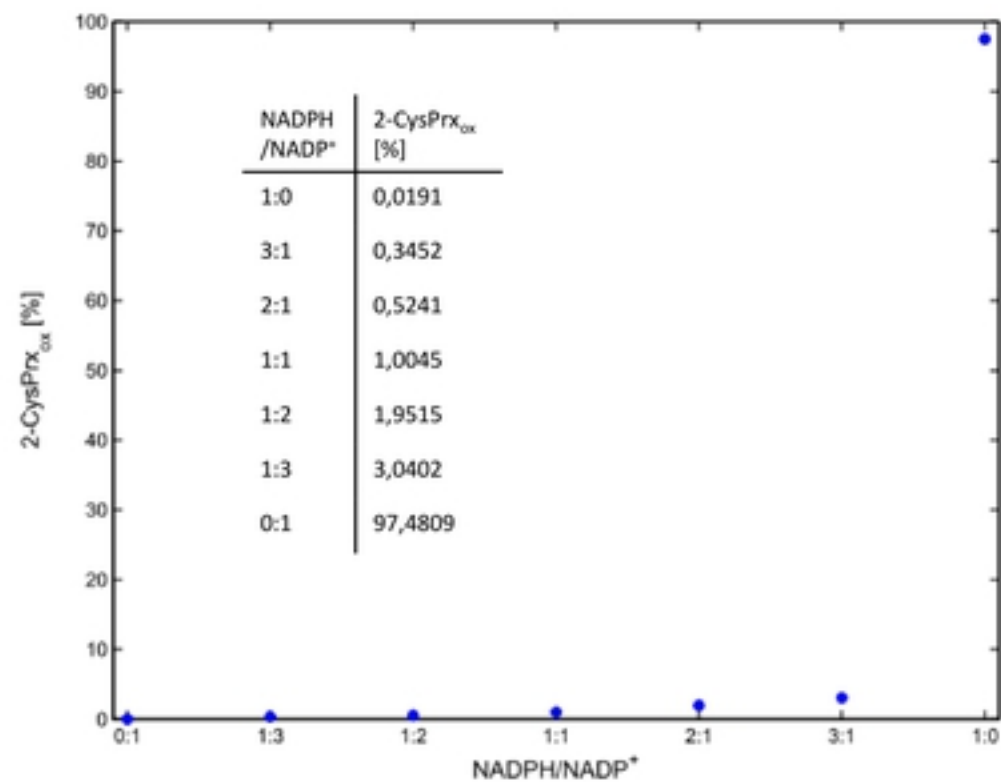

**B**

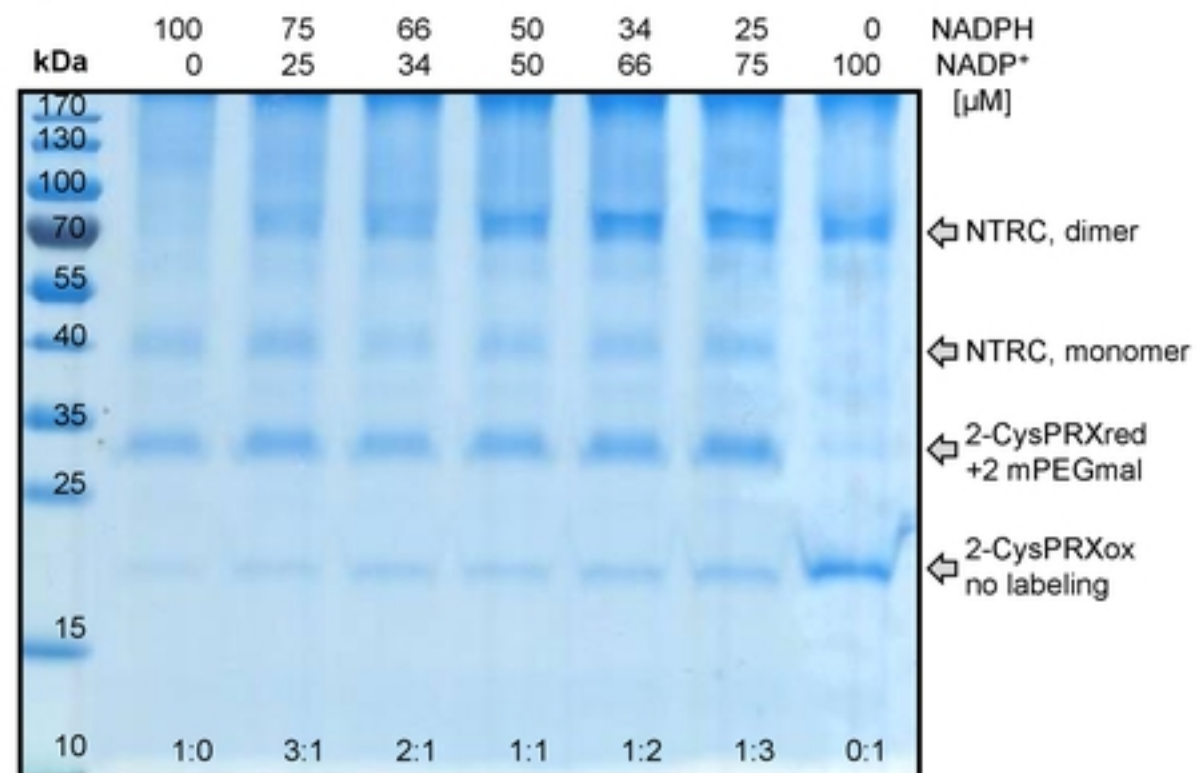

Source: https://www.biorxiv.org/content/10.1101/638437v1.full.pdf
